# Supplementary material for: Association of Body Composition With Survival and Treatment Efficacy in Castration-Resistant Prostate Cancer
Source: Front Oncol. 2020 Apr 17;10:558. doi: 10.3389/fonc.2020.00558 (PMC7180747; doi:10.3389/fonc.2020.00558)
Supplement: Table S1 — Cut-off points of body composition indices based on median values and the Contal and O'Quigley method. [file Table_1.XLSX]

## Sheet: cut-off points
		Cut off method				Median
Variable	Outcome	median	Contal & O'Quigley method			Docexaxel	ARSI
Skeletam muscle index	PSA progression	50	54.0856		SMI	49.5899	50.583
	Radiologic progression		54.0856		VFI	59.1635	60.4132
	Overall death		49.8789		SFI	46.6502	51.9617
Visceral fat index	PSA progression	60	60.3372
	Radiologic progression		55.8643
	Overall death		61.4083
Subcutaneous fat index	PSA progression	48	47.8567
	Radiologic progression		46.1903
	Overall death		44.7282

## Sheet: Contal and O'Quigley method
Var = SMI, Outcome = PP		PSA progression					Var = SMI, Outcome = RP		Radiologic progression					Var = SMI, Outcome = OS		Overall death					Var = VFI, Outcome = PP		PSA progression					Var = VFI, Outcome = RP		Radiologic progression					Var = VFI, Outcome = OS		Overall death					Var = SFI, Outcome = PP		PSA progression					Var = SFI, Outcome = RP
Cut-Points		Contal and O'Quigley Method					Cut-Points		Contal and O'Quigley Method					Cut-Points		Contal and O'Quigley Method					Cut-Points		Contal and O'Quigley Method					Cut-Points		Contal and O'Quigley Method					Cut-Points		Contal and O'Quigley Method					Cut-Points		Contal and O'Quigley Method					Cut-Points
Cut Level	SMI	SK	Absolute	Q Statistic	P-value		Cut Level	SMI	SK	Absolute	Q Statistic	P-value		Cut Level	SMI	SK	Absolute	Q Statistic	P-value		Cut Level	VFI	SK	Absolute	Q Statistic	P-value		Cut Level	VFI	SK	Absolute	Q Statistic	P-value		Cut Level	VFI	SK	Absolute	Q Statistic	P-value		Cut Level	SFI	SK	Absolute	Q Statistic	P-value		Cut Level
			SK							SK							SK							SK							SK							SK							SK
1	26.7304	0	0	0	0.3		1	26.7304	0	0	0	0.3		1	26.7304	0	0	0	0.3		1	7.75286	0	0	0	0.3		1	7.75286	0	0	0	0.3		1	7.75286	0	0	0	0.3		1	11.8051	0	0	0	0.3		1
2	32.5253	1.16178	1.16178	0.0970117	0.3		2	32.5253	1.12903	1.12903	0.0933128	0.3		2	32.5253	0.565784	0.565784	0.0467613	0.3		2	10.7993	-0.668601	0.668601	0.0558301	0.3		2	10.7993	1.63111	1.63111	0.134809	0.3		2	10.7993	-0.092802	0.0928018	0.0076699	0.3		2	14.4933	-0.732526	0.732526	0.0611681	0.3		2
3	32.8264	0.441711	0.441711	0.0368842	0.3		3	32.8264	0.20989	0.20989	0.0173471	0.3		3	32.8264	-0.220965	0.220965	0.0182624	0.3		3	11.5232	-1.58392	1.58392	0.132262	0.3		3	11.5232	0.72736	0.72736	0.0601154	0.3		3	11.5232	-0.69515	0.69515	0.0574532	0.3		3	15.915	0.661555	0.661555	0.0552418	0.3		3
4	33.1206	-0.458456	0.458456	0.0382825	0.3		4	33.1206	-0.7143	0.7143	0.059036	0.3		4	33.1206	-1.1675	1.1675	0.0964923	0.3		4	12.8081	-2.37617	2.37617	0.198417	0.3		4	12.8081	0.381926	0.381926	0.0315657	0.3		4	12.8081	-1.39531	1.39531	0.11532	0.3		4	16.7277	0.670307	0.670307	0.0559727	0.3		4
5	33.7153	-1.41281	1.41281	0.117974	0.3		5	33.7153	-1.6871	1.6871	0.139436	0.3		5	33.7153	-2.06708	2.06708	0.170841	0.3		5	12.8621	-2.36742	2.36742	0.197687	0.3		5	12.8621	0.386274	0.386274	0.031925	0.3		5	12.8621	-1.91787	1.91787	0.15851	0.3		5	17.1624	-0.121945	0.121945	0.0101828	0.3		5
6	34.823	-1.40405	1.40405	0.117243	0.3		6	34.823	-1.68275	1.68275	0.139077	0.3		6	34.823	-2.5507	2.5507	0.210812	0.3		6	16.1927	-3.13036	3.13036	0.261394	0.3		6	16.1927	-0.206648	0.206649	0.0170792	0.3		6	16.1927	-2.68805	2.68805	0.222164	0.3		6	17.7335	0.376978	0.376978	0.0314788	0.3		6
7	35.3111	-2.21342	2.21342	0.184827	0.3		7	35.3111	-2.61194	2.61194	0.215873	0.3		7	35.3111	-3.05007	3.05007	0.252084	0.3		7	16.2828	-2.63144	2.63144	0.219733	0.3		7	16.2828	0.31838	0.31838	0.0263137	0.3		7	16.2828	-1.75343	1.75342	0.144918	0.3		7	18.0496	-0.257883	0.257883	0.021534	0.3		7
8	35.325	-2.7071	2.7071	0.226051	0.3		8	35.325	-3.45074	3.45074	0.285199	0.3		8	35.325	-2.72764	2.72764	0.225436	0.3		8	16.6207	-2.19602	2.19602	0.183374	0.3		8	16.6207	0.949493	0.949493	0.0784744	0.3		8	16.6207	-1.81659	1.8166	0.150139	0.3		8	19.0143	-0.24913	0.24913	0.0208031	0.3		8
9	36.0128	-3.10814	3.10814	0.259539	0.3		9	36.0128	-3.80627	3.80627	0.314583	0.3		9	36.0128	-2.34171	2.34171	0.193539	0.3		9	17.0126	-2.92855	2.92855	0.244543	0.3		9	17.0126	0.341865	0.341865	0.0282547	0.3		9	17.0126	-2.44616	2.44616	0.202172	0.3		9	21.2054	-0.91773	0.91773	0.0766332	0.3		9
10	36.0533	-4.08118	4.08118	0.340791	0.3		10	36.0533	-4.78835	4.78835	0.395751	0.3		10	36.0533	-3.31978	3.31978	0.274375	0.3		10	17.5243	-3.37291	3.37291	0.281648	0.3		10	17.5243	-0.205362	0.205362	0.0169729	0.3		10	17.5243	-2.83604	2.83604	0.234395	0.3		10	21.6766	-1.83305	1.83305	0.153065	0.3		10
11	36.2098	-4.80749	4.80749	0.40144	0.3		11	36.2098	-5.62715	5.62715	0.465076	0.3		11	36.2098	-4.23369	4.23369	0.349909	0.3		11	17.9044	-3.50854	3.50854	0.292974	0.3		11	17.9044	-0.017085	0.0170854	0.0014121	0.3		11	17.9044	-0.818084	0.818084	0.0676135	0.3		11	22.0911	-2.50827	2.50827	0.209448	0.3		11
12	37.2268	-4.98142	4.98142	0.415964	0.3		12	37.2268	-5.84047	5.84047	0.482707	0.3		12	37.2268	-4.68478	4.68478	0.387191	0.3		12	18.0027	-4.43381	4.43381	0.370237	0.3		12	18.0027	-0.791697	0.791697	0.0654327	0.3		12	18.0027	-1.37061	1.37061	0.113279	0.3		12	22.9424	-3.46734	3.46734	0.289533	0.3		12
13	37.5706	-4.90174	4.90174	0.40931	0.3		13	37.5706	-5.80378	5.80378	0.479675	0.3		13	37.5706	-5.4985	5.4985	0.454444	0.3		13	18.6583	-4.08505	4.08505	0.341114	0.3		13	18.6583	-0.468034	0.468034	0.0386824	0.3		13	18.6583	-1.44871	1.44871	0.119734	0.3		13	23.8789	0.0100741	0.0100741	0.0008412	0.3		13
14	37.6578	-5.15752	5.15752	0.430669	0.3		14	37.6578	-5.99301	5.99301	0.495314	0.3		14	37.6578	-4.48051	4.48051	0.370309	0.3		14	19.2286	-4.06453	4.06453	0.339401	0.3		14	19.2286	-0.550919	0.550919	0.0455327	0.3		14	19.2286	-1.72892	1.72892	0.142893	0.3		14	23.9073	-0.678264	0.678264	0.056637	0.3		14
15	38.6785	-3.04122	3.04122	0.253951	0.3		15	38.6785	-3.95901	3.95901	0.327207	0.3		15	38.6785	-3.15809	3.15809	0.261012	0.3		15	20.0658	-4.69245	4.69245	0.391834	0.3		15	20.0658	-1.22896	1.22895	0.101571	0.3		15	20.0658	-2.03087	2.03087	0.167849	0.3		15	24.9807	-1.17195	1.17195	0.0978613	0.3		15
16	39.2885	-2.79818	2.79818	0.233656	0.3		16	39.2885	-3.80898	3.80898	0.314808	0.3		16	39.2885	-3.0908	3.0908	0.255451	0.3		16	22.6429	-4.6837	4.6837	0.391103	0.3		16	22.6429	-1.22461	1.22461	0.101212	0.3		16	22.6429	-2.71243	2.71243	0.224179	0.3		16	27.1736	-1.30758	1.30758	0.109187	0.3		16
17	40.3708	-3.77583	3.77583	0.315293	0.3		17	40.3708	-4.76266	4.76266	0.393628	0.3		17	40.3708	-3.62094	3.62094	0.299266	0.3		17	23.6318	-3.28962	3.28962	0.274693	0.3		17	23.6318	0.320931	0.320931	0.0265245	0.3		17	23.6318	-1.00162	1.00162	0.0827826	0.3		17	27.2727	-2.21787	2.21787	0.185199	0.3		17
18	40.4353	-3.8983	3.8983	0.32552	0.3		18	40.4353	-4.38704	4.38704	0.362583	0.3		18	40.4353	-3.16719	3.16719	0.261764	0.3		18	23.9723	-2.32331	2.32331	0.194004	0.3		18	23.9723	1.55694	1.55694	0.128679	0.3		18	23.9723	1.25919	1.25919	0.10407	0.3		18	27.799	-3.20009	3.20009	0.267217	0.3		18
19	40.731	-4.71331	4.71331	0.393576	0.3		19	40.731	-5.16771	5.16771	0.427105	0.3		19	40.731	-4.02242	4.02242	0.332448	0.3		19	25.066	-3.01165	3.01165	0.251482	0.3		19	25.066	0.852152	0.852152	0.0704292	0.3		19	25.066	0.649946	0.649946	0.0537172	0.3		19	27.8558	-3.75599	3.75599	0.313636	0.3		19
20	40.9059	-5.58252	5.58252	0.466157	0.3		20	40.9059	-6.05571	6.05571	0.500496	0.3		20	40.9059	-4.43917	4.43917	0.366892	0.3		20	26.1896	-3.07988	3.07988	0.257179	0.3		20	26.1896	0.700748	0.700748	0.0579159	0.3		20	26.1896	0.380847	0.380847	0.0314765	0.3		20	28.1675	-4.58221	4.58221	0.382628	0.3		20
21	40.9301	-6.06815	6.06814	0.506708	0.3		21	40.9301	-6.62607	6.62607	0.547636	0.3		21	40.9301	-5.12702	5.12702	0.423742	0.3		21	26.7883	-2.93734	2.93734	0.245276	0.3		21	26.7883	0.77522	0.77522	0.064071	0.3		21	26.7883	-0.009034	0.0090342	0.0007467	0.3		21	28.419	-2.93586	2.93586	0.245153	0.3		21
22	41.0652	-6.66779	6.66779	0.55678	0.3		22	41.0652	-7.18111	7.18111	0.593509	0.3		22	41.0652	-5.85117	5.85117	0.483591	0.3		22	28.2915	-3.8626	3.8626	0.322539	0.3		22	28.2915	-0.112771	0.112771	0.0093204	0.3		22	28.2915	-0.932377	0.932377	0.0770597	0.3		22	28.6236	-3.6988	3.6988	0.308861	0.3		22
23	41.168	-7.51578	7.51578	0.62759	0.3		23	41.168	-7.97376	7.97376	0.659021	0.3		23	41.168	-6.67544	6.67544	0.551717	0.3		23	28.481	-4.53783	4.53783	0.378922	0.3		23	28.481	-0.928776	0.928776	0.0767622	0.3		23	28.481	-1.78253	1.78253	0.147324	0.3		23	29.0652	-4.14317	4.14317	0.345967	0.3		23
24	41.3945	-8.03321	8.03321	0.670797	0.3		24	41.3945	-8.55922	8.55922	0.707408	0.3		24	41.3945	-7.0175	7.0175	0.579987	0.3		24	30.2457	-4.81511	4.81511	0.402076	0.3		24	30.2457	-1.26401	1.26401	0.104469	0.3		24	30.2457	-1.16315	1.16315	0.0961332	0.3		24	29.0884	-4.86323	4.86323	0.406094	0.3		24
25	41.5002	-8.56621	8.56621	0.715304	0.3		25	41.5002	-9.18853	9.18853	0.75942	0.3		25	41.5002	-7.57738	7.57738	0.626261	0.3		25	30.4453	-5.11334	5.11334	0.42698	0.3		25	30.4453	-1.72093	1.72093	0.142233	0.3		25	30.4453	-1.73748	1.73748	0.1436	0.3		25	29.316	-5.7885	5.7885	0.483357	0.3		25
26	41.5249	-9.40883	9.40883	0.785665	0.3		26	41.5249	-9.98118	9.98118	0.824932	0.3		26	41.5249	-8.2836	8.2836	0.684629	0.3		26	31.4099	-5.93956	5.93956	0.495971	0.3		26	31.4099	-2.4323	2.4323	0.201027	0.3		26	31.4099	-2.49077	2.49077	0.205859	0.3		26	29.4393	-5.97493	5.97493	0.498924	0.3		26
27	41.5312	-8.6694	8.6694	0.723921	0.3		27	41.5312	-8.23564	8.23564	0.680665	0.3		27	41.5312	-6.16565	6.16565	0.509583	0.3		27	31.4607	-6.91261	6.9126	0.577223	0.3		27	31.4607	-3.41438	3.41438	0.282194	0.3		27	31.4607	-3.46884	3.46884	0.286695	0.3		27	29.4972	-6.94797	6.94797	0.580176	0.3		27
28	41.7958	-9.61897	9.61897	0.803212	0.3		28	41.7958	-9.11832	9.11832	0.753617	0.3		28	41.7958	-6.59117	6.59117	0.544751	0.3		28	32.1183	-7.70486	7.70486	0.643379	0.3		28	32.1183	-4.16426	4.16426	0.34417	0.3		28	32.1183	-4.31389	4.31389	0.356537	0.3		28	29.8125	-6.18165	6.18165	0.516186	0.3		28
29	42.0396	-10.6102	10.6102	0.885984	0.3		29	42.0396	-8.93432	8.93432	0.73841	0.3		29	42.0396	-7.46148	7.46148	0.616681	0.3		29	32.4828	-7.14922	7.14922	0.596981	0.3		29	32.4828	-3.7193	3.7193	0.307395	0.3		29	32.4828	-4.52508	4.52508	0.373992	0.3		29	29.8792	-6.79553	6.79553	0.567447	0.3		29
30	42.1176	-11.6059	11.6058	0.969123	0.3		30	42.1176	-9.92997	9.92997	0.820699	0.3		30	42.1176	-7.04221	7.04221	0.582029	0.3		30	32.5002	-7.78408	7.78408	0.649994	0.3		30	32.5002	-3.48168	3.48168	0.287756	0.3		30	32.5002	-5.18092	5.18092	0.428196	0.3		30	30.6758	-7.7208	7.7208	0.64471	0.3		30
31	42.2005	-12.2942	12.2942	1.0266	0.243		31	42.2005	-10.6348	10.6348	0.87895	0.3		31	42.2005	-7.65145	7.65145	0.632383	0.3		31	32.5814	-8.4393	8.4393	0.704707	0.3		31	32.5814	-4.13916	4.13916	0.342096	0.3		31	32.5814	-4.53248	4.53248	0.374603	0.3		31	30.7197	-7.70302	7.70302	0.643225	0.3		31
32	42.2861	-12.9494	12.9494	1.08131	0.1929		32	42.2861	-11.2922	11.2923	0.93329	0.3		32	42.2861	-7.00301	7.00301	0.57879	0.3		32	32.6335	-7.71659	7.71659	0.644358	0.3		32	32.6335	-4.52431	4.52431	0.373928	0.3		32	32.6335	-3.97524	3.97524	0.328549	0.3		32	31.0479	-8.59809	8.59809	0.717966	0.3		32
33	42.4366	-12.9133	12.9133	1.0783	0.1955		33	42.4366	-11.8076	11.8076	0.975883	0.3		33	42.4366	-7.24951	7.24951	0.599163	0.3		33	32.8166	-8.59622	8.59622	0.71781	0.3		33	32.8166	-5.46337	5.46337	0.451541	0.3		33	32.8166	-4.91719	4.91719	0.406399	0.3		33	31.2492	-9.25331	9.25331	0.772679	0.3		33
34	42.621	-12.8081	12.8081	1.06952	0.203		34	42.621	-11.8615	11.8615	0.980337	0.3		34	42.621	-7.13673	7.13673	0.589841	0.3		34	33.0697	-9.49128	9.49128	0.792551	0.3		34	33.0697	-6.4122	6.4122	0.52996	0.3		34	33.0697	-5.82634	5.82634	0.481539	0.3		34	32.6109	-9.77856	9.77855	0.816538	0.3		34
35	42.6678	-13.2525	13.2525	1.10662	0.1727		35	42.6678	-12.4087	12.4087	1.02556	0.244		35	42.6678	-7.52661	7.52661	0.622064	0.3		35	33.3525	-10.0981	10.0981	0.843219	0.3		35	33.3525	-7.11037	7.11037	0.587662	0.3		35	33.3525	-6.56809	6.56809	0.542844	0.3		35	32.7007	-9.53551	9.53551	0.796243	0.3		35
36	42.6949	-14.2162	14.2162	1.1871	0.1194		36	42.6949	-12.3329	12.3329	1.0193	0.2504		36	42.6949	-8.48678	8.48678	0.701421	0.3		36	33.9908	-9.40627	9.40627	0.785451	0.3		36	33.9908	-5.47925	5.47925	0.452853	0.3		36	33.9908	-5.60096	5.60096	0.462912	0.3		36	33.1641	-10.3561	10.3561	0.864769	0.3		36
37	43.121	-15.0369	15.0369	1.25562	0.0854		37	43.121	-13.2419	13.2419	1.09442	0.1822		37	43.121	-8.33183	8.33183	0.688615	0.3		37	34.3765	-10.1263	10.1263	0.845579	0.3		37	34.3765	-6.39839	6.39839	0.528819	0.3		37	34.3765	-6.38771	6.38771	0.527936	0.3		37	33.7749	-10.8736	10.8736	0.907976	0.3		37
38	43.1592	-16.0053	16.0053	1.33649	0.0562		38	43.1592	-14.0693	14.0693	1.16281	0.1338		38	43.1592	-9.09642	9.09642	0.751807	0.3		38	35.8937	-8.82953	8.82953	0.737292	0.3		38	35.8937	-5.12354	5.12354	0.423454	0.3		38	35.8937	-5.68966	5.68966	0.470243	0.3		38	34.1024	-11.8603	11.8603	0.990372	0.3		38
39	43.232	-16.9105	16.9105	1.41208	0.0371		39	43.232	-14.9358	14.9358	1.23442	0.0949		39	43.232	-9.71251	9.71251	0.802727	0.3		39	36.2617	-9.32321	9.32321	0.778516	0.3		39	36.2617	-5.96234	5.96234	0.49278	0.3		39	36.2617	-5.36724	5.36724	0.443595	0.3		39	34.6977	-11.8075	11.8075	0.985962	0.3		39
40	43.3071	-17.4664	17.4664	1.4585	0.0284		40	43.3071	-15.4672	15.4672	1.27835	0.0761		40	43.3071	-10.1719	10.1719	0.840692	0.3		40	37.9063	-10.098	10.098	0.843212	0.3		40	37.9063	-6.83964	6.83964	0.565287	0.3		40	37.9063	-6.23255	6.23255	0.515112	0.3		40	35.0021	-12.4143	12.4143	1.03663	0.2332		40
41	43.5078	-17.4302	17.4302	1.45547	0.0289		41	43.5078	-15.4447	15.4447	1.27648	0.0769		41	43.5078	-11.1588	11.1588	0.922258	0.3		41	39.2884	-10.9298	10.9298	0.912668	0.3		41	39.2884	-7.58319	7.58319	0.62674	0.3		41	39.2884	-6.77021	6.77021	0.559549	0.3		41	35.05	-13.218	13.218	1.10374	0.1749		41
42	43.7061	-17.7382	17.7382	1.48119	0.0249		42	43.7061	-15.7487	15.7487	1.30161	0.0675		42	43.7061	-10.9126	10.9126	0.901915	0.3		42	39.5712	-10.8425	10.8425	0.905378	0.3		42	39.5712	-7.41532	7.41532	0.612866	0.3		42	39.5712	-7.14139	7.14139	0.590227	0.3		42	35.2323	-13.0754	13.0754	1.09184	0.1843		42
43	43.7551	-18.3591	18.3591	1.53304	0.0182		43	43.7551	-16.3992	16.3992	1.35537	0.0507		43	43.7551	-11.3963	11.3963	0.941885	0.3		43	39.8278	-11.5812	11.5812	0.967061	0.3		43	39.8278	-8.24847	8.24847	0.681725	0.3		43	39.8278	-7.92265	7.92265	0.654797	0.3		43	35.2803	-13.0667	13.0667	1.09111	0.1849		43
44	43.9437	-17.8602	17.8602	1.49138	0.0234		44	43.9437	-15.8742	15.8742	1.31198	0.064		44	43.9437	-10.4616	10.4616	0.86464	0.3		44	40.0173	-12.1371	12.1371	1.01348	0.2564		44	40.0173	-8.84139	8.84139	0.730729	0.3		44	40.0173	-8.21385	8.21385	0.678864	0.3		44	35.4627	-12.1004	12.1004	1.01042	0.2596		44
45	44.083	-18.805	18.805	1.57027	0.0144		45	44.083	-15.8517	15.8517	1.31012	0.0646		45	44.083	-8.34368	8.34368	0.689594	0.3		45	40.4193	-13.1283	13.1283	1.09625	0.1808		45	40.4193	-8.65739	8.65739	0.715522	0.3		45	40.4193	-9.08416	9.08416	0.750794	0.3		45	35.6343	-12.8926	12.8926	1.07657	0.1969		45
46	44.3984	-19.2987	19.2987	1.6115	0.0111		46	44.3984	-16.7127	16.7127	1.38128	0.044		46	44.3984	-9.07959	9.07959	0.750416	0.3		46	41.1836	-13.0922	13.0922	1.09323	0.1832		46	41.1836	-9.17275	9.17275	0.758115	0.3		46	41.1836	-9.33066	9.33066	0.771166	0.3		46	35.9161	-12.9609	12.9609	1.08227	0.1922		46
47	44.4731	-19.3669	19.3669	1.61719	0.0107		47	44.4731	-16.8641	16.8641	1.39379	0.0411		47	44.4731	-9.34869	9.34869	0.772657	0.3		47	41.3569	-13.7996	13.7996	1.15231	0.1405		47	41.3569	-9.64684	9.64684	0.797298	0.3		47	41.3569	-9.95351	9.95351	0.822644	0.3		47	35.957	-12.9403	12.9403	1.08056	0.1936		47
48	44.5363	-19.2432	19.2432	1.60687	0.0114		48	44.5363	-16.4329	16.4329	1.35815	0.05		48	44.5363	-8.02626	8.02626	0.66336	0.3		48	41.4324	-12.8958	12.8958	1.07684	0.1967		48	41.4324	-8.92265	8.92265	0.737445	0.3		48	41.4324	-8.01889	8.01889	0.66275	0.3		48	36.0761	-12.7721	12.7721	1.06651	0.2056		48
49	44.5638	-20.1635	20.1635	1.68372	0.0069		49	44.5638	-17.2546	17.2546	1.42607	0.0342		49	44.5638	-8.77384	8.77384	0.725146	0.3		49	41.9207	-13.3144	13.3144	1.11179	0.1688		49	41.9207	-9.24757	9.24757	0.7643	0.3		49	41.9207	-8.15337	8.15337	0.673865	0.3		49	36.4529	-13.7405	13.7405	1.14738	0.1437		49
50	44.5664	-20.95	20.95	1.74939	0.0044		50	44.5664	-18.1101	18.1101	1.49678	0.0227		50	44.5664	-9.36229	9.36229	0.773781	0.3		50	41.9725	-12.2782	12.2782	1.02527	0.2443		50	41.9725	-10.2387	10.2387	0.846218	0.3		50	41.9725	-8.47563	8.47563	0.7005	0.3		50	36.9329	-14.389	14.389	1.20152	0.1115		50
51	44.6758	-20.95	20.95	1.74939	0.0044		51	44.6758	-18.1058	18.1058	1.49642	0.0227		51	44.6758	-10.3536	10.3536	0.85571	0.3		51	42.0174	-11.4891	11.4891	0.959371	0.3		51	42.0174	-9.51021	9.51021	0.786007	0.3		51	42.0174	-8.16348	8.16348	0.674701	0.3		51	36.9592	-14.8076	14.8076	1.23648	0.094		51
52	44.8081	-20.5449	20.5449	1.71556	0.0056		52	44.8081	-17.8536	17.8536	1.47558	0.0257		52	44.8081	-9.38645	9.38645	0.775778	0.3		52	42.3555	-11.3208	11.3208	0.945324	0.3		52	42.3555	-9.41918	9.41918	0.778482	0.3		52	42.3555	-8.51534	8.51534	0.703782	0.3		52	37.2671	-14.8472	14.8472	1.23979	0.0925		52
53	44.8632	-21.3372	21.3371	1.78172	0.0035		53	44.8632	-18.1991	18.1991	1.50413	0.0217		53	44.8632	-10.0866	10.0866	0.833645	0.3		53	43.2747	-11.3309	11.3309	0.946161	0.3		53	43.2747	-9.53003	9.53003	0.787645	0.3		53	43.2747	-8.9581	8.9581	0.740375	0.3		53	37.4471	-15.4397	15.4397	1.28926	0.072		53
54	45.0106	-21.5236	21.5236	1.79728	0.0031		54	45.0106	-17.5225	17.5225	1.44821	0.0302		54	45.0106	-10.0504	10.0504	0.830655	0.3		54	43.6273	-11.9447	11.9447	0.997421	0.3		54	43.6273	-8.90547	8.90547	0.736025	0.3		54	43.6273	-9.62043	9.62043	0.795116	0.3		54	37.4876	-15.4497	15.4497	1.2901	0.0717		54
55	45.2822	-21.9422	21.9422	1.83224	0.0024		55	45.2822	-17.962	17.962	1.48453	0.0244		55	45.2822	-10.6176	10.6176	0.877532	0.3		55	44.1751	-11.7312	11.7312	0.979591	0.3		55	44.1751	-8.78814	8.78814	0.726328	0.3		55	44.1751	-10.52	10.52	0.869465	0.3		55	37.7229	-14.6605	14.6605	1.2242	0.0998		55
56	45.6202	-21.9334	21.9334	1.8315	0.0024		56	45.6202	-17.9576	17.9576	1.48417	0.0244		56	45.6202	-11.2992	11.2992	0.933862	0.3		56	44.5307	-11.9649	11.9649	0.999104	0.3		56	44.5307	-8.3855	8.3855	0.69305	0.3		56	44.5307	-9.29826	9.29826	0.768489	0.3		56	37.8086	-15.4699	15.4699	1.29178	0.0711		56
57	45.6392	-21.5846	21.5846	1.80238	0.003		57	45.6392	-17.6339	17.634	1.45742	0.0286		57	45.6392	-11.3773	11.3773	0.940316	0.3		57	45.0283	-10.466	10.466	0.87394	0.3		57	45.0283	-6.82713	6.82713	0.564254	0.3		57	45.0283	-8.53326	8.53326	0.705263	0.3		57	37.8569	-16.1773	16.1773	1.35085	0.052		57
58	45.6448	-21.539	21.539	1.79857	0.0031		58	45.6448	-17.6114	17.6114	1.45556	0.0289		58	45.6448	-12.3053	12.3053	1.01702	0.2527		58	45.1779	-10.6272	10.6272	0.887406	0.3		58	45.1779	-6.99136	6.99136	0.577827	0.3		58	45.1779	-8.37923	8.37923	0.692533	0.3		58	37.9529	-16.5784	16.5784	1.38434	0.0433		58
59	45.7301	-22.0797	22.0797	1.84372	0.0022		59	45.7301	-18.2962	18.2962	1.51216	0.0206		59	45.7301	-12.6276	12.6276	1.04365	0.2264		59	45.6965	-10.5816	10.5816	0.883595	0.3		59	45.6965	-6.96885	6.96885	0.575966	0.3		59	45.6965	-8.60247	8.60247	0.710983	0.3		59	38.1109	-16.9524	16.9524	1.41557	0.0364		59
60	45.9023	-22.768	22.768	1.9012	0.0015		60	45.9023	-19.027	19.027	1.57256	0.0142		60	45.9023	-11.9987	11.9988	0.991681	0.3		60	45.7779	-10.768	10.768	0.899162	0.3		60	45.7779	-6.29228	6.29228	0.520049	0.3		60	45.7779	-8.5663	8.5663	0.707994	0.3		60	38.3495	-16.346	16.346	1.36494	0.0482		60
61	45.9239	-23.4498	23.4498	1.95813	0.0009		61	45.9239	-19.8077	19.8077	1.63708	0.0094		61	45.9239	-12.6283	12.6283	1.04371	0.2264		61	45.8072	-11.3677	11.3677	0.949234	0.3		61	45.8072	-6.84732	6.84732	0.565922	0.3		61	45.8072	-9.29045	9.29045	0.767843	0.3		61	39.1954	-16.8235	16.8235	1.40481	0.0386		61
62	46.0938	-22.3801	22.3801	1.8688	0.0019		62	46.0938	-18.9591	18.9591	1.56695	0.0147		62	46.0938	-12.1039	12.1039	1.00037	0.2703		62	46.0464	-11.3589	11.3589	0.948503	0.3		62	46.0464	-6.84297	6.84297	0.565563	0.3		62	46.0464	-9.77407	9.77407	0.807814	0.3		62	39.3255	-17.7237	17.7237	1.47998	0.025		62
63	46.1211	-22.3623	22.3623	1.86732	0.0019		63	46.1211	-18.9503	18.9503	1.56622	0.0148		63	46.1211	-13.0864	13.0864	1.08158	0.1927		63	46.4332	-10.791	10.791	0.901083	0.3		63	46.4332	-5.59084	5.59085	0.462076	0.3		63	46.4332	-9.75608	9.75608	0.806327	0.3		63	39.4888	-17.5101	17.5101	1.46215	0.0278		63
64	46.1515	-21.3261	21.3261	1.7808	0.0035		64	46.1515	-17.9431	17.9431	1.48297	0.0246		64	46.1515	-12.609	12.609	1.04212	0.2279		64	46.7034	-10.5862	10.5862	0.883982	0.3		64	46.7034	-5.38174	5.38174	0.444793	0.3		64	46.7034	-9.05803	9.05803	0.748634	0.3		64	39.8824	-16.0112	16.0112	1.33698	0.056		64
65	46.2174	-20.2098	20.2098	1.68758	0.0067		65	46.2174	-17.5938	17.5938	1.4541	0.0291		65	46.2174	-11.9151	11.9151	0.984768	0.3		65	46.7565	-10.9693	10.9693	0.915972	0.3		65	46.7565	-5.87256	5.87256	0.48536	0.3		65	46.7565	-9.05728	9.05728	0.748573	0.3		65	39.9045	-16.5671	16.5671	1.3834	0.0435		65
66	46.2193	-20.0481	20.0481	1.67407	0.0074		66	46.2193	-17.5193	17.5193	1.44795	0.0302		66	46.2193	-11.0892	11.0893	0.916512	0.3		66	47.1544	-11.4946	11.4946	0.959831	0.3		66	47.1544	-6.35506	6.35506	0.525237	0.3		66	47.1544	-8.86034	8.86034	0.732295	0.3		66	40.0404	-17.4151	17.4151	1.45421	0.0291		66
67	46.4578	-20.7618	20.7618	1.73368	0.0049		67	46.4578	-18.2501	18.2501	1.50835	0.0211		67	46.4578	-11.8869	11.8869	0.982437	0.3		67	47.18	-10.5487	10.5487	0.88085	0.3		67	47.18	-5.50646	5.50646	0.455102	0.3		67	47.18	-8.42752	8.42752	0.696523	0.3		67	40.1252	-18.043	18.043	1.50665	0.0213		67
68	46.5165	-20.7868	20.7868	1.73576	0.0048		68	46.5165	-18.3471	18.3471	1.51636	0.0201		68	46.5165	-12.3211	12.3211	1.01832	0.2514		68	47.2595	-8.51575	8.51575	0.71109	0.3		68	47.2595	-3.67964	3.67964	0.304118	0.3		68	47.2595	-7.40953	7.40953	0.612388	0.3		68	40.3228	-18.7568	18.7568	1.56625	0.0148		68
69	46.5806	-21.2963	21.2963	1.77831	0.0036		69	46.5806	-19.0585	19.0585	1.57516	0.014		69	46.5806	-13.0151	13.0151	1.07568	0.1977		69	47.4799	-8.99324	8.99324	0.750962	0.3		69	47.4799	-4.08322	4.08322	0.337473	0.3		69	47.4799	-6.31674	6.31674	0.52207	0.3		69	40.4082	-19.0936	19.0936	1.59437	0.0124		69
70	46.6604	-20.9847	20.9847	1.75228	0.0043		70	46.6604	-18.8511	18.8511	1.55802	0.0156		70	46.6604	-13.423	13.423	1.1094	0.1706		70	47.6326	-9.58569	9.58569	0.800434	0.3		70	47.6326	-4.74761	4.74761	0.392383	0.3		70	47.6326	-7.07571	7.07571	0.584798	0.3		70	40.8534	-20.0432	20.0432	1.67366	0.0074		70
71	46.7254	-19.1953	19.1953	1.60286	0.0117		71	46.7254	-19.0763	19.0763	1.57663	0.0139		71	46.7254	-12.4559	12.4559	1.02946	0.2402		71	47.658	-10.0215	10.0215	0.836826	0.3		71	47.658	-5.21315	5.21315	0.43086	0.3		71	47.658	-7.57508	7.57508	0.62607	0.3		71	41.346	-19.8384	19.8384	1.65656	0.0083		71
72	46.7448	-18.8301	18.8301	1.57237	0.0142		72	46.7448	-18.8387	18.8387	1.557	0.0157		72	46.7448	-13.3262	13.3262	1.10139	0.1768		72	47.8696	-9.31974	9.31974	0.778226	0.3		72	47.8696	-4.5983	4.59829	0.380043	0.3		72	47.8696	-7.01012	7.01012	0.579377	0.3		72	41.3485	-20.332	20.3321	1.69779	0.0063		72
73	46.7787	-19.5688	19.5688	1.63405	0.0096		73	46.7787	-19.4167	19.4167	1.60476	0.0116		73	46.7787	-12.9725	12.9725	1.07216	0.2007		73	47.8789	-9.49367	9.49367	0.79275	0.3		73	47.8789	-4.81161	4.81162	0.397674	0.3		73	47.8789	-7.46121	7.46121	0.61666	0.3		73	41.5213	-19.888	19.888	1.6607	0.008		73
74	46.8099	-19.6085	19.6085	1.63737	0.0094		74	46.8099	-18.4853	18.4853	1.52778	0.0188		74	46.8099	-12.5397	12.5397	1.03639	0.2334		74	47.972	-8.42391	8.42391	0.703422	0.3		74	47.972	-3.96302	3.96302	0.327538	0.3		74	47.972	-6.93684	6.93684	0.57332	0.3		74	41.6939	-20.8656	20.8656	1.74234	0.0046		74
75	46.8724	-19.9547	19.9547	1.66628	0.0078		75	46.8724	-18.8508	18.8508	1.55799	0.0156		75	46.8724	-12.5559	12.5559	1.03773	0.2321		75	48.3053	-9.23328	9.23328	0.771006	0.3		75	48.3053	-4.89221	4.89221	0.404335	0.3		75	48.3053	-7.4362	7.4362	0.614592	0.3		75	41.8493	-20.7783	20.7783	1.73505	0.0049		75
76	46.9231	-19.1655	19.1655	1.60038	0.0119		76	46.9231	-18.1223	18.1223	1.49778	0.0225		76	46.9231	-12.2438	12.2438	1.01193	0.258		76	48.4989	-10.0539	10.0539	0.839531	0.3		76	48.4989	-5.80117	5.80117	0.479459	0.3		76	48.4989	-7.28126	7.28126	0.601786	0.3		76	42.0316	-18.8009	18.8009	1.56993	0.0145		76
77	46.988	-16.7714	16.7714	1.40046	0.0396		77	46.988	-17.0883	17.0883	1.41232	0.037		77	46.988	-11.3806	11.3806	0.94059	0.3		77	48.7416	-9.81086	9.81086	0.819236	0.3		77	48.7416	-5.65114	5.65114	0.46706	0.3		77	48.7416	-7.21397	7.21397	0.596225	0.3		77	42.0961	-18.6957	18.6957	1.56115	0.0153		77
78	47.084	-17.7582	17.7582	1.48286	0.0246		78	47.084	-18.0658	18.0658	1.49311	0.0232		78	47.084	-12.3317	12.3317	1.0192	0.2505		78	48.8304	-10.7885	10.7885	0.900873	0.3		78	48.8304	-6.60482	6.60482	0.54588	0.3		78	48.8304	-7.74411	7.74411	0.640041	0.3		78	42.1698	-19.3841	19.3841	1.61863	0.0106		78
79	47.1556	-18.6735	18.6735	1.55929	0.0155		79	47.1556	-18.9695	18.9695	1.56781	0.0147		79	47.1556	-12.934	12.934	1.06898	0.2035		79	49.3867	-11.7523	11.7523	0.98135	0.3		79	49.3867	-6.52901	6.52901	0.539614	0.3		79	49.3867	-8.70428	8.70428	0.719397	0.3		79	42.2452	-19.3478	19.3478	1.6156	0.0108		79
80	47.2433	-17.9508	17.9508	1.49894	0.0224		80	47.2433	-19.3547	19.3547	1.59964	0.012		80	47.2433	-12.3768	12.3768	1.02293	0.2467		80	50.0826	-12.5092	12.5092	1.04456	0.2256		80	50.0826	-7.16547	7.16547	0.592217	0.3		80	50.0826	-9.54418	9.54418	0.788814	0.3		80	42.5051	-16.8704	16.8704	1.40873	0.0378		80
81	47.3763	-17.5154	17.5154	1.46259	0.0277		81	47.3763	-18.7235	18.7236	1.54748	0.0166		81	47.3763	-12.44	12.44	1.02815	0.2415		81	50.125	-12.4296	12.4295	1.0379	0.2319		81	50.125	-7.12878	7.12878	0.589185	0.3		81	50.125	-10.3579	10.3579	0.856067	0.3		81	42.5751	-16.435	16.435	1.37237	0.0463		81
82	47.3808	-18.2037	18.2037	1.52006	0.0197		82	47.3808	-19.5162	19.5162	1.61299	0.011		82	47.3808	-13.2157	13.2157	1.09226	0.184		82	50.3841	-12.947	12.947	1.08111	0.1931		82	50.3841	-7.71424	7.71424	0.637572	0.3		82	50.3841	-10.7	10.7	0.884338	0.3		82	42.6992	-16.3701	16.3701	1.36695	0.0476		82
83	47.4507	-18.729	18.7289	1.56392	0.015		83	47.4507	-19.9987	19.9987	1.65287	0.0085		83	47.4507	-13.0187	13.0187	1.07598	0.1974		83	50.4169	-13.6353	13.6353	1.13859	0.1496		83	50.4169	-8.44505	8.44505	0.697973	0.3		83	50.4169	-10.0711	10.0711	0.832367	0.3		83	42.7401	-17.0519	17.0519	1.42388	0.0347		83
84	47.4996	-16.2515	16.2515	1.35705	0.0503		84	47.4996	-18.8738	18.8738	1.55989	0.0154		84	47.4996	-12.0008	12.0008	0.99185	0.3		84	50.6809	-14.4833	14.4833	1.2094	0.1073		84	50.6809	-9.2377	9.2377	0.763484	0.3		84	50.6809	-10.8954	10.8954	0.900492	0.3		84	42.8874	-17.0062	17.0062	1.42007	0.0354		84
85	47.6452	-16.9841	16.9841	1.41822	0.0358		85	47.6452	-19.4814	19.4814	1.61011	0.0112		85	47.6452	-12.6303	12.6304	1.04388	0.2262		85	50.957	-14.0167	14.0166	1.17043	0.1292		85	50.957	-8.64363	8.64363	0.714384	0.3		85	50.957	-11.0025	11.0025	0.909343	0.3		85	43.0343	-16.6575	16.6575	1.39095	0.0417		85
86	47.7307	-17.1197	17.1197	1.42955	0.0336		86	47.7307	-19.4899	19.4899	1.61081	0.0112		86	47.7307	-12.4546	12.4546	1.02935	0.2403		86	51.5044	-14.3247	14.3247	1.19615	0.1144		86	51.5044	-8.9476	8.9476	0.739508	0.3		86	51.5044	-10.7564	10.7564	0.889	0.3		86	43.6865	-16.7116	16.7116	1.39547	0.0407		86
87	47.7692	-17.0669	17.0669	1.42514	0.0344		87	47.7692	-19.7385	19.7385	1.63136	0.0098		87	47.7692	-12.8352	12.8352	1.06081	0.2107		87	52.2408	-14.8103	14.8103	1.2367	0.0939		87	52.2408	-9.51797	9.51797	0.786648	0.3		87	52.2408	-11.4442	11.4442	0.945849	0.3		87	43.838	-16.9674	16.9674	1.41683	0.0361		87
88	47.8139	-16.0307	16.0307	1.33861	0.0555		88	47.8139	-20.7296	20.7296	1.71328	0.0056		88	47.8139	-13.1575	13.1575	1.08745	0.1879		88	52.2863	-14.0211	14.0211	1.17081	0.1289		88	52.2863	-8.80055	8.80055	0.727354	0.3		88	52.2863	-11.1258	11.1258	0.919531	0.3		88	43.8791	-16.0215	16.0215	1.33785	0.0558		88
89	47.8942	-16.9104	16.9104	1.41207	0.0371		89	47.8942	-21.6687	21.6687	1.79089	0.0033		89	47.8942	-14.0994	14.0994	1.1653	0.1323		89	52.5693	-14.577	14.577	1.21722	0.1033		89	52.5693	-9.33197	9.33197	0.771275	0.3		89	52.5693	-11.5851	11.5851	0.957496	0.3		89	43.8997	-16.9268	16.9268	1.41344	0.0368		89
90	48.0035	-17.1091	17.1091	1.42866	0.0337		90	48.0035	-21.8329	21.8329	1.80446	0.003		90	48.0035	-14.0066	14.0066	1.15763	0.1371		90	52.6171	-14.5121	14.5121	1.2118	0.1061		90	52.6171	-9.30005	9.30005	0.768637	0.3		90	52.6171	-12.5178	12.5178	1.03458	0.2351		90	44.133	-17.918	17.918	1.49621	0.0227		90
91	48.0367	-16.32	16.32	1.36277	0.0487		91	48.0367	-21.1155	21.1155	1.74517	0.0045		91	48.0367	-13.7068	13.7068	1.13285	0.1536		91	52.7435	-14.5033	14.5033	1.21107	0.1064		91	52.7435	-9.2957	9.2957	0.768277	0.3		91	52.7435	-13.5135	13.5135	1.11687	0.165		91	44.5583	-16.8819	16.8819	1.40969	0.0376		91
92	48.1249	-15.475	15.475	1.29221	0.0709		92	48.1249	-20.5572	20.5572	1.69902	0.0062		92	48.1249	-12.7396	12.7396	1.05292	0.2178		92	52.9454	-14.639	14.639	1.2224	0.1007		92	52.9454	-9.30413	9.30413	0.768974	0.3		92	52.9454	-13.3377	13.3377	1.10235	0.176		92	44.7282	-16.8731	16.8731	1.40896	0.0377		92
93	48.1358	-15.4662	15.4662	1.29148	0.0712		93	48.1358	-20.5528	20.5528	1.69866	0.0062		93	48.1358	-13.7353	13.7353	1.1352	0.1519		93	53.3159	-13.8727	13.8727	1.15841	0.1366		93	53.3159	-9.58672	9.58672	0.79233	0.3		93	53.3159	-13.9673	13.9673	1.15438	0.1392		93	44.7598	-16.7494	16.7495	1.39863	0.04		93
94	48.2157	-15.0897	15.0897	1.26003	0.0836		94	48.2157	-20.0913	20.0913	1.66052	0.0081		94	48.2157	-13.4642	13.4642	1.11279	0.1681		94	53.7148	-14.1284	14.1284	1.17977	0.1236		94	53.7148	-9.77594	9.77594	0.807969	0.3		94	53.7148	-12.9493	12.9493	1.07024	0.2024		94	45.1052	-16.7038	16.7038	1.39482	0.0408		94
95	48.4023	-16.015	16.015	1.3373	0.0559		95	48.4023	-20.8659	20.8659	1.72454	0.0052		95	48.4023	-14.0167	14.0167	1.15846	0.1366		95	53.7704	-14.2376	14.2376	1.18888	0.1184		95	53.7704	-9.9005	9.9005	0.818263	0.3		95	53.7704	-12.8757	12.8757	1.06416	0.2077		95	45.4158	-17.573	17.573	1.4674	0.027		95
96	48.5059	-16.8842	16.8842	1.40988	0.0375		96	48.5059	-20.9049	20.9049	1.72776	0.0051		96	48.5059	-13.2202	13.2202	1.09263	0.1837		96	54.5467	-13.9151	13.9151	1.16195	0.1344		96	54.5467	-8.60184	8.60184	0.710931	0.3		96	54.5467	-12.1669	12.1669	1.00558	0.2647		96	45.4204	-18.388	18.388	1.53546	0.0179		96
97	48.6128	-14.6568	14.6568	1.22388	0.1		97	48.6128	-21.2194	21.2194	1.75375	0.0043		97	48.6128	-12.6937	12.6937	1.04911	0.2213		97	54.6505	-14.8835	14.8835	1.24282	0.0911		97	54.6505	-9.4293	9.4293	0.77932	0.3		97	54.6505	-12.9315	12.9315	1.06877	0.2036		97	46.1533	-19.2676	19.2677	1.60891	0.0113		97
98	48.6428	-15.2492	15.2492	1.27335	0.0781		98	48.6428	-21.8837	21.8837	1.80866	0.0029		98	48.6428	-13.4526	13.4526	1.11184	0.1688		98	54.7554	-15.4165	15.4165	1.28733	0.0727		98	54.7554	-10.0586	10.0586	0.831332	0.3		98	54.7554	-13.4914	13.4914	1.11505	0.1664		98	46.1903	-20.2633	20.2633	1.69204	0.0065		98
99	48.665	-16.1745	16.1745	1.35062	0.0521		99	48.665	-22.7717	22.7717	1.88205	0.0017		99	48.665	-14.376	14.376	1.18816	0.1188		99	54.8762	-15.8176	15.8176	1.32081	0.0611		99	54.8762	-10.4141	10.4142	0.860716	0.3		99	54.8762	-13.1055	13.1055	1.08315	0.1914		99	46.2672	-20.1935	20.1935	1.68622	0.0068		99
100	48.7897	-15.4082	15.4082	1.28663	0.073		100	48.7897	-23.0543	23.0543	1.90541	0.0014		100	48.7897	-15.0055	15.0055	1.24019	0.0923		100	55.0297	-15.8717	15.8717	1.32534	0.0596		100	55.0297	-10.5522	10.5522	0.872128	0.3		100	55.0297	-13.6506	13.6506	1.1282	0.1568		100	46.3209	-20.7342	20.7342	1.73137	0.005		100
101	48.9331	-16.0361	16.0361	1.33906	0.0554		101	48.9331	-23.7324	23.7324	1.96145	0.0009		101	48.9331	-15.3075	15.3075	1.26514	0.0814		101	55.4979	-16.8539	16.8539	1.40735	0.0381		101	55.4979	-11.5389	11.5389	0.953672	0.3		101	55.4979	-14.6198	14.6198	1.2083	0.1079		101	46.3832	-20.1663	20.1663	1.68395	0.0069		101
102	48.9596	-12.5587	12.5587	1.04869	0.2217		102	48.9596	-20.1535	20.1535	1.66566	0.0078		102	48.9596	-16.1159	16.1159	1.33196	0.0576		102	55.6523	-15.4488	15.4488	1.29002	0.0717		102	55.6523	-11.2402	11.2402	0.928988	0.3		102	55.6523	-14.7678	14.7678	1.22054	0.1016		102	46.4237	-19.6997	19.6997	1.64498	0.0089		102
103	48.9918	-11.9123	11.9123	0.994714	0.3		103	48.9918	-19.2678	19.2679	1.59246	0.0125		103	48.9918	-13.0717	13.0717	1.08036	0.1937		103	55.8154	-15.8137	15.8137	1.32049	0.0612		103	55.8154	-11.4294	11.4294	0.944627	0.3		103	55.8154	-15.2826	15.2826	1.26309	0.0823		103	46.4622	-19.0079	19.0079	1.58721	0.013		103
104	49.0717	-12.2863	12.2863	1.02594	0.2437		104	49.0717	-19.7161	19.7161	1.62951	0.0099		104	49.0717	-13.5311	13.5311	1.11833	0.164		104	55.8643	-16.2829	16.2829	1.35967	0.0496		104	55.8643	-12.1007	12.1007	1.0001	0.2706		104	55.8643	-15.9949	15.9949	1.32196	0.0607		104	46.5919	-19.5638	19.5638	1.63363	0.0096		104
105	49.0799	-12.9615	12.9615	1.08233	0.1921		105	49.0799	-20.5321	20.5321	1.69695	0.0063		105	49.0799	-14.3813	14.3813	1.18859	0.1186		105	55.8748	-16.9449	16.9449	1.41495	0.0365		105	55.8748	-11.7512	11.7512	0.971222	0.3		105	55.8748	-16.2299	16.2299	1.34138	0.0547		105	46.7085	-20.2901	20.2901	1.69428	0.0064		105
106	49.1423	-13.5683	13.5683	1.133	0.1535		106	49.1423	-21.2303	21.2303	1.75465	0.0042		106	49.1423	-15.123	15.123	1.2499	0.0879		106	55.9146	-16.9845	16.9845	1.41826	0.0358		106	55.9146	-10.8198	10.8198	0.894243	0.3		106	55.9146	-15.7971	15.7971	1.30561	0.0661		106	46.8911	-21.18	21.18	1.76859	0.0038		106
107	49.1864	-12.4632	12.4632	1.04071	0.2292		107	49.1864	-21.1903	21.1903	1.75135	0.0043		107	49.1864	-14.5658	14.5658	1.20384	0.1102		107	56.4099	-17.5252	17.5252	1.46341	0.0276		107	56.4099	-11.5046	11.5046	0.95084	0.3		107	56.4099	-16.1193	16.1193	1.33224	0.0575		107	46.9111	-22.1248	22.1248	1.84748	0.0022		107
108	49.3242	-11.1664	11.1664	0.932425	0.3		108	49.3242	-19.9154	19.9154	1.64598	0.0089		108	49.3242	-13.8677	13.8677	1.14615	0.1445		108	56.4838	-17.4201	17.4201	1.45463	0.0291		108	56.4838	-11.5585	11.5585	0.955294	0.3		108	56.4838	-16.0065	16.0065	1.32292	0.0604		108	47.2243	-22.8817	22.8817	1.91069	0.0013		108
109	49.3409	-11.5312	11.5312	0.962889	0.3		109	49.3409	-20.1046	20.1046	1.66162	0.008		109	49.3409	-14.3826	14.3826	1.1887	0.1185		109	57.845	-15.7737	15.7737	1.31715	0.0622		109	57.845	-9.92737	9.92738	0.820485	0.3		109	57.845	-15.0993	15.0993	1.24794	0.0888		109	47.5225	-22.72	22.72	1.89718	0.0015		109
110	49.5028	-10.73	10.73	0.895984	0.3		110	49.5028	-20.3648	20.3647	1.68312	0.0069		110	49.5028	-14.964	14.964	1.23676	0.0939		110	58.3936	-15.7514	15.7514	1.31529	0.0629		110	58.3936	-9.91402	9.91402	0.819381	0.3		110	58.3936	-15.9289	15.9288	1.3165	0.0625		110	47.6909	-23.181	23.181	1.93568	0.0011		110
111	49.528	-11.1743	11.1743	0.93309	0.3		111	49.528	-21.0891	21.0891	1.74299	0.0046		111	49.528	-15.6133	15.6133	1.29042	0.0716		111	58.4532	-16.6413	16.6413	1.3896	0.0421		111	58.4532	-10.8531	10.8531	0.896993	0.3		111	58.4532	-16.8935	16.8935	1.39623	0.0405		111	47.7142	-23.1448	23.1448	1.93266	0.0011		111
112	49.677	-10.8519	10.8519	0.906165	0.3		112	49.677	-19.7904	19.7904	1.63565	0.0095		112	49.677	-14.9045	14.9045	1.23184	0.0962		112	58.4567	-16.7638	16.7638	1.39983	0.0397		112	58.4567	-10.4775	10.4775	0.865949	0.3		112	58.4567	-16.4398	16.4398	1.35873	0.0498		112	47.8567	-23.4431	23.4431	1.95757	0.0009		112
113	49.8365	-11.6028	11.6028	0.968867	0.3		113	49.8365	-20.4269	20.4269	1.68826	0.0067		113	49.8365	-15.2167	15.2167	1.25764	0.0846		113	58.907	-16.694	16.694	1.394	0.041		113	58.907	-7.8986	7.8986	0.652809	0.3		113	58.907	-14.979	14.979	1.23799	0.0933		113	48.0492	-23.0779	23.0779	1.92708	0.0012		113
114	49.8611	-12.4345	12.4346	1.03832	0.2315		114	49.8611	-21.1704	21.1705	1.74971	0.0044		114	49.8611	-15.7543	15.7543	1.30208	0.0674		114	59.1065	-17.5632	17.5632	1.46658	0.0271		114	59.1065	-7.93756	7.93756	0.656029	0.3		114	59.1065	-14.1824	14.1824	1.17216	0.1281		114	48.1177	-22.5223	22.5223	1.88068	0.0017		114
115	49.8789	-13.2268	13.2268	1.10448	0.1744		115	49.8789	-21.9203	21.9203	1.81169	0.0028		115	49.8789	-16.5994	16.5994	1.37192	0.0464		115	59.2205	-15.1692	15.1691	1.26667	0.0808		115	59.2205	-6.90357	6.90357	0.570571	0.3		115	59.2205	-13.3192	13.3192	1.10082	0.1772		115	48.1836	-21.4861	21.4862	1.79416	0.0032		115
116	49.8973	-13.7043	13.7043	1.14435	0.1457		116	49.8973	-22.3239	22.3239	1.84504	0.0022		116	49.8973	-15.5066	15.5066	1.2816	0.0749		116	59.5078	-16.1235	16.1235	1.34636	0.0533		116	59.5078	-7.87636	7.87636	0.650971	0.3		116	59.5078	-14.2188	14.2188	1.17517	0.1263		116	48.2892	-21.081	21.081	1.76033	0.0041		116
117	49.9703	-14.5942	14.5942	1.21866	0.1026		117	49.9703	-23.263	23.263	1.92265	0.0012		117	49.9703	-16.4713	16.4713	1.36133	0.0491		117	59.6726	-16.8053	16.8053	1.40329	0.039		117	59.6726	-8.65704	8.65704	0.715493	0.3		117	59.6726	-14.8484	14.8484	1.2272	0.0984		117	48.7346	-21.8197	21.8197	1.82201	0.0026		117
118	49.9814	-15.4476	15.4476	1.28992	0.0717		118	49.9814	-23.6574	23.6574	1.95525	0.001		118	49.9814	-14.4271	14.4271	1.19238	0.1164		118	59.7982	-17.609	17.609	1.4704	0.0265		118	59.7982	-9.59118	9.59118	0.792698	0.3		118	59.7982	-15.6831	15.6831	1.29619	0.0695		118	48.9758	-21.7401	21.7401	1.81536	0.0027		118
119	50.0878	-15.3603	15.3603	1.28263	0.0745		119	50.0878	-23.4895	23.4895	1.94138	0.0011		119	50.0878	-14.7983	14.7983	1.22306	0.1004		119	59.8647	-18.3477	18.3477	1.53209	0.0183		119	59.8647	-10.1691	10.1691	0.840464	0.3		119	59.8647	-15.3294	15.3294	1.26696	0.0807		119	49.1567	-21.0383	21.0383	1.75676	0.0042		119
120	50.3838	-14.3273	14.3273	1.19637	0.1142		120	50.3838	-22.7153	22.7153	1.87739	0.0017		120	50.3838	-13.4759	13.4759	1.11377	0.1673		120	60.2325	-17.5465	17.5465	1.46518	0.0273		120	60.2325	-10.4292	10.4292	0.861962	0.3		120	60.2325	-15.9108	15.9108	1.31501	0.063		120	49.2913	-21.6731	21.6731	1.80977	0.0029		120
121	50.45	-15.2376	15.2376	1.27238	0.0785		121	50.45	-23.6738	23.6738	1.95661	0.0009		121	50.45	-14.4315	14.4315	1.19275	0.1162		121	60.3372	-18.496	18.496	1.54447	0.0169		121	60.3372	-11.3119	11.3119	0.934914	0.3		121	60.3372	-16.3364	16.3364	1.35018	0.0522		121	49.6647	-19.5569	19.5568	1.63305	0.0097		121
122	50.5078	-15.5553	15.5553	1.29892	0.0685		122	50.5078	-24.0955	24.0955	1.99146	0.0007		122	50.5078	-12.635	12.635	1.04427	0.2259		122	60.3929	-17.9281	17.9281	1.49705	0.0226		122	60.3929	-10.4851	10.4851	0.866578	0.3		122	60.3929	-16.1379	16.1379	1.33377	0.057		122	49.7459	-20.5112	20.5112	1.71275	0.0057		122
123	50.6581	-14.949	14.949	1.24828	0.0886		123	50.6581	-23.9473	23.9473	1.97921	0.0008		123	50.6581	-11.7964	11.7964	0.974953	0.3		123	60.7263	-17.7011	17.7011	1.4781	0.0253		123	60.7263	-10.3746	10.3746	0.857445	0.3		123	60.7263	-15.5329	15.5329	1.28377	0.0741		123	49.9931	-19.3494	19.3494	1.61573	0.0108		123
124	50.7189	-13.9827	13.9827	1.1676	0.1309		124	50.7189	-22.7112	22.7112	1.87705	0.0017		124	50.7189	-9.53554	9.53554	0.7881	0.3		124	60.8619	-14.2237	14.2237	1.18772	0.119		124	60.8619	-6.7957	6.7957	0.561656	0.3		124	60.8619	-16.3413	16.3413	1.35059	0.0521		124	50.0728	-19.6267	19.6267	1.63889	0.0093		124
125	50.7571	-13.9129	13.9129	1.16177	0.1345		125	50.7571	-20.1324	20.1324	1.66391	0.0079		125	50.7571	-8.07473	8.07473	0.667365	0.3		125	61.012	-14.2149	14.215	1.18699	0.1195		125	61.012	-6.79135	6.79135	0.561296	0.3		125	61.012	-17.3149	17.3149	1.43106	0.0333		125	50.1416	-18.7229	18.7229	1.56342	0.0151		125
126	50.7891	-14.5478	14.5478	1.21478	0.1045		126	50.7891	-19.8947	19.8947	1.64427	0.009		126	50.7891	-8.73056	8.73056	0.721569	0.3		126	61.1883	-14.9897	14.9897	1.25169	0.0871		126	61.1883	-7.64133	7.64132	0.631545	0.3		126	61.1883	-18.2097	18.2097	1.50501	0.0216		126	50.3064	-18.9566	18.9566	1.58293	0.0133		126
127	50.8283	-15.4117	15.4117	1.28693	0.0729		127	50.8283	-19.8239	19.8239	1.63842	0.0093		127	50.8283	-9.61557	9.61557	0.794715	0.3		127	61.3186	-14.7167	14.7167	1.22889	0.0976		127	61.3186	-7.14855	7.14855	0.590819	0.3		127	61.3186	-17.7202	17.7202	1.46455	0.0274		127	50.3681	-18.6836	18.6836	1.56014	0.0154		127
128	50.8695	-15.6675	15.6675	1.30828	0.0652		128	50.8695	-19.6949	19.6949	1.62776	0.01		128	50.8695	-9.64844	9.64844	0.797431	0.3		128	61.4083	-14.3516	14.3516	1.1984	0.1131		128	61.4083	-6.91093	6.91093	0.571179	0.3		128	61.4083	-18.5905	18.5905	1.53648	0.0178		128	50.5712	-18.8575	18.8575	1.57466	0.014		128
129	50.9141	-16.6266	16.6266	1.38837	0.0423		129	50.9141	-20.6582	20.6582	1.70738	0.0059		129	50.9141	-10.5188	10.5188	0.869361	0.3		129	61.6953	-14.0548	14.0548	1.17362	0.1272		129	61.6953	-5.02529	5.02529	0.415334	0.3		129	61.6953	-18.4573	18.4573	1.52547	0.019		129	50.8398	-19.7778	19.7778	1.65151	0.0086		129
130	51.0783	-17.1825	17.1825	1.43479	0.0326		130	51.0783	-21.2511	21.2511	1.75638	0.0042		130	51.0783	-10.81	10.81	0.893428	0.3		130	62.0784	-13.6497	13.6497	1.13979	0.1488		130	62.0784	-4.77317	4.77317	0.394496	0.3		130	62.0784	-17.4902	17.4902	1.44554	0.0306		130	50.9348	-20.5526	20.5526	1.7162	0.0055		130
131	51.1377	-17.5746	17.5746	1.46753	0.0269		131	51.1377	-21.8139	21.8139	1.80289	0.003		131	51.1377	-10.9841	10.9841	0.907822	0.3		131	62.079	-14.2845	14.2845	1.1928	0.1162		131	62.079	-5.53554	5.53554	0.457506	0.3		131	62.079	-18.3505	18.3505	1.51664	0.0201		131	51.1214	-19.3252	19.3252	1.61371	0.0109		131
132	51.1794	-18.0439	18.0439	1.50672	0.0213		132	51.1794	-22.4851	22.4851	1.85836	0.002		132	51.1794	-11.6963	11.6963	0.966688	0.3		132	62.699	-13.1794	13.1794	1.10052	0.1774		132	62.699	-5.49556	5.49555	0.4542	0.3		132	62.699	-17.7932	17.7932	1.47059	0.0265		132	51.1799	-19.7696	19.7696	1.65082	0.0086		132
133	51.3429	-17.098	17.098	1.42774	0.0339		133	51.3429	-21.6365	21.6365	1.78823	0.0033		133	51.3429	-11.2635	11.2635	0.930916	0.3		133	62.8994	-12.3902	12.3902	1.03462	0.2351		133	62.8994	-4.77814	4.77814	0.394907	0.3		133	62.8994	-17.4934	17.4934	1.44581	0.0306		133	51.2656	-19.9683	19.9683	1.66742	0.0077		133
134	51.3816	-15.9362	15.9362	1.33072	0.0579		134	51.3816	-22.4467	22.4467	1.85519	0.002		134	51.3816	-10.5655	10.5655	0.873223	0.3		134	63.045	-13.2328	13.2328	1.10498	0.174		134	63.045	-5.57079	5.57079	0.460418	0.3		134	63.045	-18.1996	18.1996	1.50417	0.0217		134	51.5921	-20.0775	20.0775	1.67653	0.0072		134
135	51.4885	-16.1586	16.1586	1.34929	0.0524		135	51.4885	-22.74	22.74	1.87943	0.0017		135	51.4885	-9.78872	9.78872	0.809025	0.3		135	63.1688	-12.6265	12.6265	1.05435	0.2165		135	63.1688	-5.42253	5.42253	0.448165	0.3		135	63.1688	-17.3609	17.3609	1.43486	0.0326		135	51.8962	-20.5468	20.5468	1.71572	0.0055		135
136	51.5121	-15.9755	15.9755	1.334	0.0569		136	51.5121	-21.7001	21.7001	1.79348	0.0032		136	51.5121	-9.1786	9.1786	0.758599	0.3		136	63.2163	-11.9801	11.9801	1.00038	0.2703		136	63.2163	-4.53689	4.53689	0.374968	0.3		136	63.2163	-14.3168	14.3168	1.18326	0.1216		136	52.0271	-19.5106	19.5106	1.6292	0.0099		136
137	51.52	-15.2737	15.2737	1.2754	0.0773		137	51.52	-21.0852	21.0852	1.74266	0.0046		137	51.52	-8.93757	8.93757	0.738678	0.3		137	63.2491	-12.6286	12.6286	1.05452	0.2163		137	63.2491	-5.07624	5.07624	0.419544	0.3		137	63.2491	-14.9053	14.9053	1.2319	0.0961		137	52.1267	-19.6463	19.6463	1.64052	0.0092		137
138	51.5306	-16.0307	16.0307	1.33861	0.0555		138	51.5306	-21.7217	21.7217	1.79527	0.0032		138	51.5306	-9.77747	9.77747	0.808095	0.3		138	64.1424	-13.1223	13.1223	1.09575	0.1812		138	64.1424	-5.93723	5.93723	0.490704	0.3		138	64.1424	-15.6412	15.6412	1.29272	0.0707		138	52.2673	-20.5155	20.5155	1.7131	0.0056		138
139	51.5702	-16.3863	16.3863	1.3683	0.0473		139	51.5702	-22.1523	22.1523	1.83086	0.0025		139	51.5702	-9.88456	9.88456	0.816946	0.3		139	64.4232	-12.8106	12.8106	1.06972	0.2028		139	64.4232	-5.72988	5.72988	0.473567	0.3		139	64.4232	-16.0491	16.0491	1.32643	0.0593		139	52.3145	-20.9513	20.9513	1.7495	0.0044		139
140	51.7809	-16.9642	16.9642	1.41656	0.0361		140	51.7809	-22.7744	22.7744	1.88227	0.0017		140	51.7809	-10.5968	10.5968	0.875811	0.3		140	65.2893	-13.3665	13.3665	1.11614	0.1656		140	65.2893	-6.00135	6.00135	0.496004	0.3		140	65.2893	-14.2525	14.2525	1.17795	0.1247		140	53.0311	-21.8309	21.8309	1.82295	0.0026		140
141	51.898	-16.7507	16.7507	1.39873	0.04		141	51.898	-22.6571	22.6571	1.87258	0.0018		141	51.898	-11.4964	11.4964	0.95016	0.3		141	65.512	-13.7127	13.7127	1.14505	0.1453		141	65.512	-6.36689	6.36689	0.526215	0.3		141	65.512	-14.2687	14.2687	1.17929	0.1239		141	53.4707	-20.6691	20.6691	1.72593	0.0052		141
142	51.9204	-17.6906	17.6906	1.47722	0.0254		142	51.9204	-23.4256	23.4256	1.93609	0.0011		142	51.9204	-12.3154	12.3154	1.01785	0.2519		142	65.8477	-14.6575	14.6575	1.22394	0.1		142	65.8477	-6.34438	6.34438	0.524355	0.3		142	65.8477	-12.1508	12.1508	1.00425	0.2661		142	53.4906	-20.2926	20.2926	1.69449	0.0064		142
143	52.057	-17.9628	17.9628	1.49995	0.0222		143	52.057	-23.6685	23.6685	1.95617	0.0009		143	52.057	-11.6413	11.6413	0.96214	0.3		143	66.1038	-15.444	15.444	1.28962	0.0719		143	66.1038	-7.19987	7.19988	0.59506	0.3		143	66.1038	-12.7393	12.7392	1.05288	0.2178		143	53.6859	-20.4151	20.4151	1.70472	0.006		143
144	52.0798	-18.5187	18.5187	1.54637	0.0168		144	52.0798	-23.9399	23.9399	1.97861	0.0008		144	52.0798	-9.84479	9.84479	0.813659	0.3		144	66.2976	-15.1942	15.1942	1.26876	0.0799		144	66.2976	-6.92502	6.92502	0.572344	0.3		144	66.2976	-12.7721	12.7721	1.0556	0.2154		144	54.0352	-19.1183	19.1183	1.59643	0.0122		144
145	52.134	-19.3224	19.3224	1.61347	0.011		145	52.134	-24.8741	24.8741	2.05581	0.0004		145	52.134	-10.6795	10.6795	0.882648	0.3		145	66.3045	-14.4924	14.4924	1.21016	0.1069		145	66.3045	-6.31017	6.31017	0.521527	0.3		145	66.3045	-12.5311	12.5311	1.03568	0.2341		145	54.057	-19.3291	19.3291	1.61404	0.0109		145
146	52.2144	-19.6592	19.6592	1.6416	0.0091		146	52.2144	-24.8979	24.8979	2.05778	0.0004		146	52.2144	-10.8662	10.8662	0.898074	0.3		146	66.403	-13.3307	13.3307	1.11315	0.1678		146	66.403	-5.1423	5.1423	0.425004	0.3		146	66.403	-11.939	11.939	0.986741	0.3		146	54.2023	-18.6064	18.6064	1.55369	0.016		146
147	52.2534	-18.0128	18.0128	1.50412	0.0217		147	52.2534	-23.2668	23.2668	1.92297	0.0012		147	52.2534	-9.95896	9.95896	0.823095	0.3		147	66.6311	-13.775	13.775	1.15026	0.1418		147	66.6311	-5.86666	5.86666	0.484872	0.3		147	66.6311	-12.5883	12.5883	1.04041	0.2295		147	54.7383	-16.2123	16.2123	1.35378	0.0512		147
148	52.4567	-18.9479	18.9479	1.5822	0.0134		148	52.4567	-24.0167	24.0167	1.98495	0.0008		148	52.4567	-9.82927	9.82927	0.812376	0.3		148	66.7914	-14.1118	14.1118	1.17838	0.1244		148	66.7914	-5.89047	5.89047	0.48684	0.3		148	66.7914	-12.7749	12.7749	1.05583	0.2152		148	54.8613	-16.5203	16.5203	1.3795	0.0445		148
149	52.6562	-19.9301	19.9301	1.66422	0.0079		149	52.6562	-25.0033	25.0033	2.06649	0.0004		149	52.6562	-10.7984	10.7984	0.892476	0.3		149	66.9017	-14.3341	14.3341	1.19694	0.1139		149	66.9017	-6.18381	6.18381	0.511084	0.3		149	66.9017	-11.9982	11.9982	0.991633	0.3		149	54.9805	-16.8666	16.8666	1.40841	0.0379		149
150	52.9654	-20.7049	20.7049	1.72892	0.0051		150	52.9654	-25.8806	25.8806	2.139	0.0002		150	52.9654	-11.6637	11.6637	0.963993	0.3		150	66.9078	-13.4892	13.4892	1.12639	0.1581		150	66.9078	-5.62545	5.62545	0.464936	0.3		150	66.9078	-11.031	11.031	0.911701	0.3		150	55.0611	-15.2202	15.2202	1.27093	0.0791		150
151	52.9865	-20.4551	20.4551	1.70806	0.0058		151	52.9865	-25.6058	25.6058	2.11628	0.0003		151	52.9865	-11.6966	11.6966	0.966709	0.3		151	67.1549	-13.8813	13.8813	1.15913	0.1361		151	67.1549	-6.18818	6.18818	0.511445	0.3		151	67.1549	-11.2052	11.2052	0.926095	0.3		151	55.0634	-15.8821	15.8821	1.32621	0.0593		151
152	53.0689	-20.5234	20.5234	1.71376	0.0056		152	53.0689	-25.6744	25.6744	2.12195	0.0002		152	53.0689	-10.0027	10.0027	0.826711	0.3		152	67.3341	-13.1795	13.1795	1.10053	0.1774		152	67.3341	-5.57333	5.57333	0.460628	0.3		152	67.3341	-10.9528	10.9528	0.905232	0.3		152	55.1481	-14.777	14.777	1.23392	0.0952		152
153	53.086	-20.9844	20.9844	1.75226	0.0043		153	53.086	-26.1978	26.1978	2.16521	0.0002		153	53.086	-10.7949	10.7949	0.892187	0.3		153	67.782	-13.9058	13.9058	1.16118	0.1349		153	67.782	-6.41213	6.41213	0.529954	0.3		153	67.782	-11.8667	11.8667	0.980765	0.3		153	55.1967	-14.0752	14.0752	1.17532	0.1262		153
154	53.2084	-21.403	21.403	1.78721	0.0034		154	53.2084	-26.5227	26.5227	2.19207	0.0001		154	53.2084	-10.9294	10.9294	0.903301	0.3		154	68.2204	-11.9284	11.9284	0.996057	0.3		154	68.2204	-4.33326	4.33326	0.358138	0.3		154	68.2204	-8.82253	8.82253	0.729171	0.3		154	55.4834	-12.7264	12.7264	1.0627	0.209		154
155	53.21	-20.3668	20.3668	1.70069	0.0061		155	53.21	-25.4994	25.4994	2.10749	0.0003		155	53.21	-11.405	11.405	0.942611	0.3		155	68.2646	-12.8387	12.8387	1.07207	0.2008		155	68.2646	-5.29176	5.29176	0.437357	0.3		155	68.2646	-9.77818	9.77818	0.808154	0.3		155	55.7616	-13.6664	13.6664	1.14118	0.1479		155
156	53.2463	-20.3212	20.3212	1.69688	0.0063		156	53.2463	-25.4769	25.4769	2.10563	0.0003		156	53.2463	-11.6283	11.6283	0.961062	0.3		156	68.2826	-12.1369	12.1369	1.01347	0.2564		156	68.2826	-4.48099	4.48099	0.370348	0.3		156	68.2826	-9.39427	9.39427	0.776424	0.3		156	55.8463	-12.9646	12.9646	1.08258	0.1919		156
157	53.2798	-21.1474	21.1474	1.76587	0.0039		157	53.2798	-26.1882	26.1882	2.16442	0.0002		157	53.2798	-12.3816	12.3816	1.02332	0.2463		157	69.0882	-10.9751	10.9751	0.916458	0.3		157	69.0882	-3.35196	3.35196	0.277035	0.3		157	69.0882	-8.82849	8.82849	0.729663	0.3		157	56.0422	-13.7033	13.7033	1.14427	0.1458		157
158	53.4198	-21.9222	21.9222	1.83057	0.0025		158	53.4198	-27.0382	27.0382	2.23467	<.0001		158	53.4198	-13.2763	13.2763	1.09727	0.18		158	69.1574	-11.7902	11.7902	0.984514	0.3		158	69.1574	-4.13263	4.13263	0.341556	0.3		158	69.1574	-9.68372	9.68372	0.800347	0.3		158	56.4291	-14.4542	14.4542	1.20697	0.1086		158
159	53.4465	-21.7174	21.7174	1.81347	0.0028		159	53.4465	-26.8291	26.8291	2.21739	0.0001		159	53.4465	-12.5783	12.5783	1.03958	0.2303		159	69.7631	-10.4414	10.4414	0.871888	0.3		159	69.7631	-2.70141	2.70141	0.223268	0.3		159	69.7631	-8.07876	8.07876	0.667699	0.3		159	56.49	-14.1574	14.1574	1.18218	0.1222		159
160	53.727	-21.4904	21.4904	1.79451	0.0032		160	53.727	-26.7186	26.7186	2.20826	0.0001		160	53.727	-11.9733	11.9733	0.989577	0.3		160	70.3731	-9.21398	9.21398	0.769395	0.3		160	70.3731	-1.32254	1.32254	0.109306	0.3		160	70.3731	-7.33486	7.33486	0.606217	0.3		160	56.8421	-14.5495	14.5495	1.21493	0.1045		160
161	53.9066	-21.7352	21.7352	1.81495	0.0028		161	53.9066	-26.7114	26.7114	2.20766	0.0001		161	53.9066	-12.1723	12.1723	1.00602	0.2642		161	70.3969	-9.16118	9.16118	0.764985	0.3		161	70.3969	-1.57116	1.57116	0.129854	0.3		161	70.3969	-7.71549	7.71549	0.637675	0.3		161	57.3514	-14.8373	14.8373	1.23896	0.0928		161
162	53.9336	-22.6148	22.6148	1.8884	0.0016		162	53.9336	-27.6099	27.6099	2.28192	<.0001		162	53.9336	-10.9965	10.9965	0.908848	0.3		162	70.4868	-10.1202	10.1202	0.84507	0.3		162	70.4868	-2.53447	2.53447	0.209471	0.3		162	70.4868	-8.58579	8.58579	0.709605	0.3		162	58.3599	-14.0481	14.0481	1.17306	0.1276		162
163	53.9406	-23.3222	23.3222	1.94748	0.001		163	53.9406	-28.084	28.084	2.32111	<.0001		163	53.9406	-11.6194	11.6194	0.960326	0.3		163	71.3388	-9.99657	9.99657	0.834743	0.3		163	71.3388	-2.10326	2.10326	0.173831	0.3		163	71.3388	-7.26337	7.26337	0.600308	0.3		163	58.4867	-14.5577	14.5577	1.21561	0.1041		163
164	53.961	-22.6205	22.6205	1.88888	0.0016		164	53.961	-27.4691	27.4691	2.27029	<.0001		164	53.961	-11.3669	11.367	0.939464	0.3		164	71.369	-7.76915	7.76915	0.648747	0.3		164	71.369	0.132757	0.132757	0.0109722	0.3		164	71.369	-5.94095	5.94095	0.491011	0.3		164	58.609	-15.1357	15.1357	1.26387	0.082		164
165	54.0643	-23.2689	23.2689	1.94302	0.0011		165	54.0643	-28.0085	28.0085	2.31487	<.0001		165	54.0643	-11.9554	11.9554	0.988099	0.3		165	71.7612	-8.48293	8.48293	0.70835	0.3		165	71.7612	-0.598054	0.598054	0.0494284	0.3		165	71.7612	-6.73859	6.73859	0.556936	0.3		165	59.0543	-14.8859	14.8859	1.24302	0.091		165
166	54.0856	-24.0076	24.0076	2.00471	0.0006		166	54.0856	-28.8416	28.8416	2.38372	<.0001		166	54.0856	-12.7367	12.7367	1.05267	0.218		166	72.2756	-7.44679	7.44679	0.621829	0.3		166	72.2756	0.425269	0.425269	0.0351479	0.3		166	72.2756	-7.21421	7.21421	0.596245	0.3		166	59.3998	-15.6724	15.6724	1.30869	0.0651		166
167	54.2734	-23.2182	23.2182	1.93879	0.0011		167	54.2734	-27.8846	27.8846	2.30462	<.0001		167	54.2734	-11.4758	11.4759	0.948464	0.3		167	72.4086	-6.28501	6.28501	0.524817	0.3		167	72.4086	-0.384923	0.384923	0.0318134	0.3		167	72.4086	-6.51617	6.51617	0.538553	0.3		167	59.449	-16.272	16.272	1.35876	0.0498		167
168	54.4112	-23.429	23.429	1.95639	0.0009		168	54.4112	-27.8612	27.8612	2.3027	<.0001		168	54.4112	-10.3218	10.3218	0.853085	0.3		168	72.4547	-6.65901	6.65901	0.556048	0.3		168	72.4547	-0.833151	0.833151	0.0688588	0.3		168	72.4547	-6.97553	6.97553	0.576518	0.3		168	59.4884	-15.9604	15.9604	1.33274	0.0573		168
169	54.4414	-22.7372	22.7372	1.89863	0.0015		169	54.4414	-26.2301	26.2301	2.16789	0.0002		169	54.4414	-9.35469	9.35469	0.773153	0.3		169	72.7324	-7.65465	7.65465	0.639186	0.3		169	72.7324	-1.8288	1.8288	0.151148	0.3		169	72.7324	-6.55626	6.55626	0.541866	0.3		169	59.7107	-16.7233	16.7233	1.39645	0.0405		169
170	54.4904	-21.0909	21.0909	1.76115	0.004		170	54.4904	-24.599	24.599	2.03308	0.0005		170	54.4904	-8.46178	8.46178	0.699355	0.3		170	73.2188	-8.01022	8.01022	0.668877	0.3		170	73.2188	-2.25941	2.25941	0.186737	0.3		170	73.2188	-6.66335	6.66335	0.550717	0.3		170	59.9125	-16.7146	16.7146	1.39572	0.0406		170
171	54.5429	-21.0821	21.0821	1.76042	0.0041		171	54.5429	-24.5947	24.5947	2.03272	0.0005		171	54.5429	-8.98434	8.98434	0.742544	0.3		171	73.844	-8.88984	8.88984	0.742328	0.3		171	73.844	-3.15793	3.15793	0.260999	0.3		171	73.844	-5.48758	5.48758	0.453541	0.3		171	59.9287	-16.8102	16.8102	1.4037	0.0389		171
172	54.9499	-21.0616	21.0616	1.75871	0.0041		172	54.9499	-24.6776	24.6776	2.03957	0.0005		172	54.9499	-9.26455	9.26455	0.765703	0.3		172	74.0833	-9.20759	9.20759	0.768861	0.3		172	74.0833	-3.64876	3.64876	0.301565	0.3		172	74.0833	-6.21173	6.21173	0.513391	0.3		172	59.9875	-17.585	17.585	1.4684	0.0268		172
173	54.9721	-20.9967	20.9967	1.75328	0.0043		173	54.9721	-24.6456	24.6456	2.03693	0.0005		173	54.9721	-10.1973	10.1973	0.84279	0.3		173	74.3516	-10.0609	10.0609	0.840117	0.3		173	74.3516	-4.04316	4.04316	0.334162	0.3		173	74.3516	-4.16758	4.16758	0.344445	0.3		173	60.2872	-15.552	15.552	1.29864	0.0686		173
174	55.003	-19.4977	19.4978	1.62812	0.01		174	55.003	-23.0873	23.0873	1.90813	0.0014		174	55.003	-9.43227	9.43227	0.779565	0.3		174	75.1802	-10.0431	10.0431	0.838632	0.3		174	75.1802	-4.03433	4.03433	0.333432	0.3		174	75.1802	-5.15008	5.15007	0.425647	0.3		174	60.6289	-16.5158	16.5158	1.37911	0.0446		174
175	55.0241	-20.1116	20.1116	1.67938	0.0071		175	55.0241	-22.4627	22.4627	1.85651	0.002		175	55.0241	-10.0946	10.0946	0.834305	0.3		175	75.4915	-10.1388	10.1388	0.846617	0.3		175	75.4915	-3.80394	3.80394	0.314391	0.3		175	75.4915	-5.31141	5.31141	0.438981	0.3		175	60.7249	-16.8806	16.8806	1.40958	0.0376		175
176	55.0753	-19.4099	19.4099	1.62078	0.0105		176	55.0753	-21.6519	21.6519	1.7895	0.0033		176	55.0753	-9.71069	9.71069	0.802576	0.3		176	75.9336	-8.02247	8.02246	0.6699	0.3		176	75.9336	-1.67904	1.67904	0.13877	0.3		176	75.9336	-3.98898	3.98898	0.329684	0.3		176	60.8844	-15.7643	15.7643	1.31636	0.0625		176
177	55.1101	-19.8457	19.8457	1.65717	0.0082		177	55.1101	-22.1175	22.1175	1.82798	0.0025		177	55.1101	-10.2101	10.2101	0.843848	0.3		177	76.5242	-8.02247	8.02246	0.6699	0.3		177	76.5242	-1.67469	1.67469	0.138411	0.3		177	76.5242	-4.98027	4.98027	0.411612	0.3		177	60.9403	-15.0625	15.0625	1.25776	0.0845		177
178	55.1517	-19.5727	19.5727	1.63438	0.0096		178	55.1517	-21.6247	21.6247	1.78725	0.0034		178	55.1517	-9.7206	9.7206	0.803395	0.3		178	76.7216	-8.77336	8.77336	0.732602	0.3		178	76.7216	-2.31115	2.31115	0.191013	0.3		178	76.7216	-5.29242	5.29242	0.437412	0.3		178	61.3324	-15.3183	15.3183	1.27912	0.0758		178
179	55.2294	-17.4564	17.4564	1.45766	0.0285		179	55.2294	-19.4998	19.4998	1.61163	0.0111		179	55.2294	-8.39817	8.39817	0.694098	0.3		179	77.5493	-9.39428	9.39428	0.784451	0.3		179	77.5493	-2.96169	2.96169	0.24478	0.3		179	77.5493	-5.77604	5.77604	0.477382	0.3		179	61.8931	-16.1609	16.1609	1.34948	0.0524		179
180	55.3049	-15.479	15.479	1.29254	0.0708		180	55.3049	-17.4209	17.4209	1.43982	0.0317		180	55.3049	-5.35403	5.35403	0.442503	0.3		180	77.6934	-9.46251	9.46251	0.790148	0.3		180	77.6934	-3.03029	3.03029	0.250449	0.3		180	77.6934	-4.08215	4.08215	0.337384	0.3		180	62.0189	-15.9779	15.9778	1.3342	0.0569		180
181	55.425	-13.446	13.446	1.12278	0.1607		181	55.425	-15.5941	15.5941	1.28883	0.0721		181	55.425	-4.33604	4.33604	0.358368	0.3		181	78.086	-9.41686	9.41686	0.786336	0.3		181	78.086	-3.00778	3.00778	0.248589	0.3		181	78.086	-5.01019	5.01019	0.414085	0.3		181	62.2611	-14.681	14.681	1.22591	0.099		181
182	55.449	-12.6568	12.6568	1.05688	0.2142		182	55.449	-14.8767	14.8767	1.22954	0.0973		182	55.449	-4.0176	4.0176	0.332049	0.3		182	78.3576	-10.2755	10.2755	0.858036	0.3		182	78.3576	-3.87967	3.87967	0.32065	0.3		182	78.3576	-5.37176	5.37176	0.443969	0.3		182	62.4291	-15.0996	15.0996	1.26086	0.0832		182
183	55.6087	-13.0399	13.0399	1.08887	0.1867		183	55.6087	-15.3675	15.3675	1.27011	0.0794		183	55.6087	-4.01685	4.01685	0.331987	0.3		183	78.6405	-9.57375	9.57375	0.799436	0.3		183	78.6405	-3.26482	3.26481	0.269833	0.3		183	78.6405	-5.11933	5.11933	0.423106	0.3		183	62.6701	-15.6326	15.6326	1.30537	0.0662		183
184	55.6295	-12.3381	12.3381	1.03027	0.2394		184	55.6295	-14.7527	14.7527	1.21929	0.1023		184	55.6295	-3.45189	3.45189	0.285294	0.3		184	79.0921	-8.45744	8.45744	0.706222	0.3		184	79.0921	-2.91551	2.91551	0.240963	0.3		184	79.0921	-4.42544	4.42544	0.365757	0.3		184	62.859	-15.9882	15.9882	1.33506	0.0566		184
185	55.6322	-12.7392	12.7392	1.06376	0.208		185	55.6322	-15.1654	15.1653	1.2534	0.0864		185	55.6322	-3.13974	3.13974	0.259495	0.3		185	79.3965	-8.87602	8.87602	0.741174	0.3		185	79.3965	-3.35497	3.35497	0.277284	0.3		185	79.3965	-4.99262	4.99262	0.412633	0.3		185	63.0083	-15.1988	15.1988	1.26914	0.0798		185
186	55.9116	-12.9004	12.9004	1.07723	0.1964		186	55.9116	-15.3296	15.3296	1.26697	0.0807		186	55.9116	-2.98571	2.98571	0.246765	0.3		186	80.0951	-6.84305	6.84305	0.571415	0.3		186	80.0951	-1.46933	1.46933	0.121438	0.3		186	80.0951	-4.77087	4.77087	0.394306	0.3		186	63.0598	-15.5819	15.5819	1.30113	0.0677		186
187	55.9933	-11.5517	11.5517	0.9646	0.3		187	55.9933	-13.8984	13.8984	1.14868	0.1429		187	55.9933	-1.38074	1.38075	0.114117	0.3		187	80.159	-7.78298	7.78298	0.649902	0.3		187	80.159	-2.23784	2.23784	0.184954	0.3		187	80.159	-5.58988	5.58988	0.461996	0.3		187	63.2076	-14.7806	14.7806	1.23423	0.095		187
188	55.996	-12.3146	12.3146	1.02831	0.2413		188	55.996	-14.4913	14.4913	1.19768	0.1135		188	55.996	-2.15092	2.15092	0.177771	0.3		188	81.6694	-7.80792	7.80792	0.651985	0.3		188	81.6694	-2.33481	2.33481	0.192969	0.3		188	81.6694	-6.02409	6.02409	0.497883	0.3		188	63.2689	-15.469	15.469	1.29171	0.0711		188
189	56.0277	-12.3059	12.3059	1.02758	0.242		189	56.0277	-14.4869	14.4869	1.19733	0.1137		189	56.0277	-3.12454	3.12454	0.25824	0.3		189	81.8718	-6.51112	6.51112	0.543698	0.3		189	81.8718	-2.5718	2.5718	0.212556	0.3		189	81.8718	-6.28196	6.28196	0.519196	0.3		189	63.917	-16.3223	16.3223	1.36296	0.0487		189
190	56.0522	-13.1431	13.1431	1.09749	0.1798		190	56.0522	-15.401	15.401	1.27287	0.0783		190	56.0522	-4.01444	4.01444	0.331788	0.3		190	82.4581	-6.34934	6.34934	0.530189	0.3		190	82.4581	-2.49733	2.49733	0.206401	0.3		190	82.4581	-5.45611	5.45611	0.45094	0.3		190	64.0081	-15.5331	15.5331	1.29706	0.0691		190
191	56.1117	-12.4413	12.4413	1.03889	0.231		191	56.1117	-14.7861	14.7861	1.22205	0.1009		191	56.1117	-3.76201	3.76201	0.310925	0.3		191	82.6078	-6.75037	6.75037	0.563676	0.3		191	82.6078	-2.90999	2.91	0.240507	0.3		191	82.6078	-5.14396	5.14396	0.425142	0.3		191	64.251	-16.3918	16.3918	1.36876	0.0472		191
192	56.2596	-11.2795	11.2795	0.941875	0.3		192	56.2596	-14.2602	14.2602	1.17859	0.1243		192	56.2596	-3.06396	3.06396	0.253232	0.3		192	83.3866	-7.03819	7.03819	0.587709	0.3		192	83.3866	-3.28543	3.28543	0.271537	0.3		192	83.3866	-4.026	4.026	0.332744	0.3		192	64.4665	-14.9867	14.9867	1.25143	0.0872		192
193	56.6786	-11.1113	11.1113	0.927827	0.3		193	56.6786	-14.1692	14.1692	1.17106	0.1288		193	56.6786	-4.0013	4.0013	0.330702	0.3		193	85.8443	-7.29397	7.29397	0.609068	0.3		193	85.8443	-3.1564	3.1564	0.260872	0.3		193	85.8443	-4.05887	4.05887	0.33546	0.3		193	64.6465	-14.2849	14.2849	1.19283	0.1162		193
194	56.6787	-11.4291	11.4291	0.95436	0.3		194	56.6787	-14.66	14.66	1.21163	0.1061		194	56.6787	-4.72545	4.72545	0.390552	0.3		194	86.375	-7.28884	7.28884	0.608639	0.3		194	86.375	-3.06407	3.06407	0.253242	0.3		194	86.375	-4.00418	4.00418	0.33094	0.3		194	65.0436	-15.1167	15.1167	1.26229	0.0826		194
195	57.1319	-12.0639	12.0639	1.00737	0.2628		195	57.1319	-15.4224	15.4224	1.27464	0.0776		195	57.1319	-5.58573	5.58573	0.461653	0.3		195	86.5114	-7.49966	7.49966	0.626244	0.3		195	86.5114	-3.04075	3.04075	0.251314	0.3		195	86.5114	-2.85015	2.85015	0.235561	0.3		195	65.211	-15.3615	15.3615	1.28273	0.0744		195
196	57.3039	-10.7671	10.7671	0.899085	0.3		196	57.3039	-15.6594	15.6594	1.29423	0.0702		196	57.3039	-5.84359	5.84359	0.482965	0.3		196	86.5221	-7.31661	7.31661	0.610958	0.3		196	86.5221	-2.00076	2.00076	0.16536	0.3		196	86.5221	-2.24003	2.24003	0.185136	0.3		196	65.888	-15.1345	15.1345	1.26377	0.082		196
197	57.3921	-9.19922	9.19922	0.768162	0.3		197	57.3921	-14.2567	14.2567	1.1783	0.1245		197	57.3921	-5.00493	5.00493	0.413651	0.3		197	86.5798	-7.28037	7.28037	0.607933	0.3		197	86.5798	-1.97825	1.97825	0.1635	0.3		197	86.5798	-3.22693	3.22693	0.266702	0.3		197	66.0219	-14.812	14.812	1.23685	0.0938		197
198	57.561	-7.9718	7.9718	0.665669	0.3		198	57.561	-12.8779	12.8779	1.06434	0.2075		198	57.561	-4.26103	4.26103	0.352169	0.3		198	86.6499	-7.85833	7.85833	0.656194	0.3		198	86.6499	-2.58588	2.58588	0.213719	0.3		198	86.6499	-4.02999	4.02999	0.333073	0.3		198	66.4242	-14.9733	14.9733	1.25031	0.0877		198
199	57.6762	-7.82926	7.82926	0.653766	0.3		199	57.6762	-12.8034	12.8034	1.05818	0.213		199	57.6762	-4.65091	4.65091	0.384392	0.3		199	86.8155	-8.0571	8.0571	0.672792	0.3		199	86.8155	-2.7501	2.7501	0.227292	0.3		199	86.8155	-3.9372	3.9372	0.325404	0.3		199	66.56	-14.1283	14.1283	1.17976	0.1236		199
200	57.91	-7.26137	7.26137	0.606346	0.3		200	57.91	-11.9766	11.9766	0.989848	0.3		200	57.91	-4.45242	4.45242	0.367986	0.3		200	87.6831	-6.26768	6.26768	0.52337	0.3		200	87.6831	-2.97533	2.97533	0.245907	0.3		200	87.6831	-2.97006	2.97006	0.245472	0.3		200	67.4967	-14.7492	14.7492	1.2316	0.0963		200
201	58.3322	-8.15643	8.15643	0.681087	0.3		201	58.3322	-12.9254	12.9254	1.06827	0.2041		201	58.3322	-5.36156	5.36156	0.443126	0.3		201	91.4276	-5.82358	5.82358	0.486286	0.3		201	91.4276	-3.66683	3.66683	0.303059	0.3		201	91.4276	-3.63884	3.63884	0.300746	0.3		201	67.9185	-13.1052	13.1051	1.09432	0.1823		201
202	58.5016	-6.99466	6.99466	0.584075	0.3		202	58.5016	-11.7575	11.7575	0.971745	0.3		202	58.5016	-4.76946	4.76946	0.39419	0.3		202	91.6992	-5.44704	5.44704	0.454844	0.3		202	91.6992	-3.20531	3.20531	0.264915	0.3		202	91.6992	-3.3677	3.3677	0.278336	0.3		202	69.2567	-10.8777	10.8777	0.908323	0.3		202
203	58.7245	-6.09086	6.09086	0.508605	0.3		203	58.7245	-11.0333	11.0333	0.911891	0.3		203	58.7245	-2.83484	2.83484	0.234296	0.3		203	92.2267	-5.76478	5.76478	0.481376	0.3		203	92.2267	-3.62699	3.62699	0.299766	0.3		203	92.2267	-1.57118	1.57118	0.129856	0.3		203	69.309	-9.71596	9.71596	0.811311	0.3		203
204	58.9527	-6.37867	6.37867	0.532638	0.3		204	58.9527	-11.4088	11.4088	0.942921	0.3		204	58.9527	-1.71688	1.71688	0.141898	0.3		204	93.596	-6.75152	6.75152	0.563772	0.3		204	93.596	-4.60448	4.60448	0.380554	0.3		204	93.596	-2.52228	2.52228	0.208463	0.3		204	69.3253	-9.14807	9.14807	0.763891	0.3		204
205	58.9809	-4.97356	4.97356	0.415307	0.3		205	58.9809	-11.1101	11.1101	0.918237	0.3		205	58.9809	-1.86488	1.86488	0.15413	0.3		205	95.7838	-4.27411	4.27411	0.356901	0.3		205	95.7838	-3.47958	3.47958	0.287582	0.3		205	95.7838	-1.50432	1.50432	0.12433	0.3		205	69.8627	-9.14294	9.14294	0.763462	0.3		205
206	59.2241	-4.41792	4.41792	0.36891	0.3		206	59.2241	-10.6652	10.6652	0.881461	0.3		206	59.2241	-2.07608	2.07608	0.171585	0.3		206	96.253	-5.17935	5.17935	0.432491	0.3		206	96.253	-4.34603	4.34603	0.359194	0.3		206	96.253	-2.12042	2.12042	0.17525	0.3		206	69.8893	-8.10997	8.10997	0.677206	0.3		206
207	60.5938	-4.51355	4.51355	0.376895	0.3		207	60.5938	-10.4348	10.4348	0.86242	0.3		207	60.5938	-2.23741	2.23741	0.184919	0.3		207	97.9723	-5.68891	5.68891	0.475041	0.3		207	97.9723	-5.0574	5.0574	0.417988	0.3		207	97.9723	-2.81444	2.81444	0.23261	0.3		207	69.9733	-7.04021	7.04021	0.587878	0.3		207
208	61.0797	-4.62269	4.62269	0.386008	0.3		208	61.0797	-10.5593	10.5593	0.872715	0.3		208	61.0797	-2.16385	2.16385	0.178839	0.3		208	98.3631	-4.65277	4.65277	0.38852	0.3		208	98.3631	-4.05021	4.05021	0.334745	0.3		208	98.3631	-2.337	2.337	0.19315	0.3		208	70.635	-4.92391	4.92391	0.411161	0.3		208
209	61.0946	-4.45446	4.45446	0.371961	0.3		209	61.0946	-10.4683	10.4683	0.86519	0.3		209	61.0946	-2.51571	2.51571	0.20792	0.3		209	99.1651	-5.58784	5.58784	0.466602	0.3		209	99.1651	-4.80009	4.80009	0.396721	0.3		209	99.1651	-2.20731	2.20731	0.182431	0.3		209	70.942	-4.90156	4.90156	0.409295	0.3		209
210	61.2785	-4.59009	4.59009	0.383286	0.3		210	61.2785	-10.28	10.28	0.84963	0.3		210	61.2785	-0.497759	0.497759	0.0411391	0.3		210	99.857	-3.36043	3.36043	0.280606	0.3		210	99.857	-5.11459	5.11459	0.422714	0.3		210	99.857	-1.68081	1.68081	0.138917	0.3		210	71.5819	-5.38718	5.38718	0.449846	0.3		210
211	61.5157	-4.12342	4.12342	0.344318	0.3		211	61.5157	-9.68594	9.68594	0.80053	0.3		211	61.5157	-0.604846	0.604846	0.0499897	0.3		211	100.149	-2.57101	2.57101	0.214687	0.3		211	100.149	-4.15752	4.15752	0.343614	0.3		211	100.149	-0.42	0.42	0.0347125	0.3		211	72.0383	-3.35421	3.35421	0.280087	0.3		211
212	61.6036	-4.78536	4.78536	0.399592	0.3		212	61.6036	-9.33648	9.33648	0.771648	0.3		212	61.6036	-0.839852	0.839852	0.0694127	0.3		212	101.734	-3.44022	3.44022	0.287268	0.3		212	101.734	-5.04551	5.04551	0.417005	0.3		212	101.734	-0.836749	0.836749	0.0691562	0.3		212	72.6172	-4.21816	4.21816	0.352229	0.3		212
213	61.7694	-4.21747	4.21747	0.352171	0.3		213	61.7694	-8.08435	8.08435	0.668161	0.3		213	61.7694	-0.821862	0.821862	0.0679259	0.3		213	102.558	-2.70079	2.70079	0.225524	0.3		213	102.558	-3.29997	3.29997	0.272739	0.3		213	102.558	1.28121	1.28121	0.10589	0.3		213	72.9569	-4.21816	4.21816	0.352229	0.3		213
214	61.9938	-2.82339	2.82339	0.235761	0.3		214	61.9938	-6.53882	6.53882	0.540425	0.3		214	61.9938	0.888949	0.888949	0.0734705	0.3		214	103.163	-3.46374	3.46374	0.289232	0.3		214	103.163	-4.26805	4.26805	0.352749	0.3		214	103.163	0.367298	0.367298	0.0303567	0.3		214	72.9995	-4.04993	4.04993	0.338181	0.3		214
215	62.4303	-2.65516	2.65516	0.221714	0.3		215	62.4303	-6.44778	6.44778	0.5329	0.3		215	62.4303	0.213759	0.213759	0.0176669	0.3		215	103.252	-4.38406	4.38405	0.366082	0.3		215	103.252	-5.08981	5.08981	0.420666	0.3		215	103.252	-0.380275	0.380275	0.0314293	0.3		215	73.6126	-3.8817	3.8817	0.324134	0.3		215
216	62.8197	-3.32376	3.32376	0.277544	0.3		216	62.8197	-4.81667	4.81666	0.398091	0.3		216	62.8197	0.120957	0.120957	0.0099969	0.3		216	104.209	-4.21583	4.21583	0.352034	0.3		216	104.209	-4.99877	4.99877	0.413141	0.3		216	104.209	-1.05547	1.05547	0.0872329	0.3		216	74.3229	-3.90665	3.90665	0.326217	0.3		216
217	63.0142	-4.08671	4.08671	0.341252	0.3		217	63.0142	-5.78474	5.78474	0.478101	0.3		217	63.0142	-0.792951	0.792951	0.0655364	0.3		217	104.66	-4.79379	4.79379	0.400295	0.3		217	104.66	-5.62089	5.62089	0.464559	0.3		217	104.66	-1.76771	1.76771	0.146099	0.3		217	76.4187	-3.2603	3.2603	0.272245	0.3		217
218	64.4124	-4.09673	4.09672	0.342089	0.3		218	64.4124	-5.8956	5.8956	0.487264	0.3		218	64.4124	-1.23571	1.23571	0.10213	0.3		218	105.913	-3.14971	3.14971	0.26301	0.3		218	105.913	-2.87535	2.87535	0.237644	0.3		218	105.913	0.0288186	0.0288186	0.0023818	0.3		218	76.5027	-1.69241	1.69241	0.141321	0.3		218
219	64.9539	-1.86931	1.86931	0.156093	0.3		219	64.9539	-3.65959	3.65959	0.30246	0.3		219	64.9539	0.0867104	0.0867104	0.0071665	0.3		219	106.094	-3.3945	3.3945	0.283451	0.3		219	106.094	-2.86816	2.86816	0.237049	0.3		219	106.094	-0.170179	0.170179	0.0140651	0.3		219	77.0739	-2.52962	2.52962	0.211231	0.3		219
220	65.4545	-2.10299	2.10299	0.175606	0.3		220	65.4545	-3.25694	3.25694	0.269182	0.3		220	65.4545	1.30846	1.30846	0.108143	0.3		220	106.493	-1.74815	1.74815	0.145976	0.3		220	106.493	-1.23704	1.23704	0.10224	0.3		220	106.493	0.722733	0.722733	0.059733	0.3		220	78.6394	-3.07794	3.07794	0.257017	0.3		220
221	65.6108	-2.96165	2.96165	0.247307	0.3		221	65.6108	-4.12883	4.12883	0.341242	0.3		221	65.6108	0.946891	0.946891	0.0782593	0.3		221	107.747	-2.58536	2.58536	0.215885	0.3		221	107.747	-2.15111	2.15111	0.177786	0.3		221	107.747	-0.167159	0.167159	0.0138154	0.3		221	78.8088	-0.850529	0.850529	0.0710217	0.3		221
222	66.077	-3.01579	3.01579	0.251828	0.3		222	66.077	-4.2669	4.2669	0.352654	0.3		222	66.077	0.401768	0.401768	0.0332056	0.3		222	110.807	-3.04639	3.04639	0.254382	0.3		222	110.807	-2.67452	2.67452	0.221046	0.3		222	110.807	-0.959372	0.959372	0.0792908	0.3		222	83.4185	-1.7856	1.7856	0.149103	0.3		222
223	66.2666	-3.56412	3.56412	0.297614	0.3		223	66.2666	-4.77412	4.77412	0.394575	0.3		223	66.2666	0.724193	0.724193	0.0598536	0.3		223	112.876	-2.87816	2.87816	0.240335	0.3		223	112.876	-2.58349	2.58349	0.213522	0.3		223	112.876	-1.89671	1.89671	0.156761	0.3		223	83.9209	-1.85383	1.85383	0.1548	0.3		223
224	66.4018	-4.14208	4.14208	0.345876	0.3		224	66.4018	-5.38175	5.38175	0.444795	0.3		224	66.4018	-0.07886	0.0788605	0.0065177	0.3		224	115.441	-3.77833	3.77833	0.315502	0.3		224	115.441	-3.50767	3.50768	0.289905	0.3		224	115.441	-2.84325	2.84325	0.234991	0.3		224	84.0523	-2.25486	2.25486	0.188288	0.3		224
225	67.3818	-4.44031	4.4403	0.370779	0.3		225	67.3818	-5.83868	5.83867	0.482559	0.3		225	67.3818	-0.653185	0.653185	0.0539849	0.3		225	120.512	-4.46666	4.46666	0.37298	0.3		225	120.512	-4.30032	4.30032	0.355416	0.3		225	120.512	-3.61898	3.61898	0.299104	0.3		225	85.3944	-0.465438	0.465438	0.0388655	0.3		225
226	67.4048	-4.41796	4.41796	0.368912	0.3		226	67.4048	-5.82532	5.82532	0.481455	0.3		226	67.4048	-1.4827	1.4827	0.122543	0.3		226	126.634	-5.01499	5.01499	0.418766	0.3		226	126.634	-4.80755	4.80754	0.397337	0.3		226	126.634	-3.29655	3.29655	0.272456	0.3		226	86.1568	-0.783181	0.783181	0.0653979	0.3		226
227	71.4065	-4.12115	4.12115	0.344128	0.3		227	71.4065	-3.93968	3.93968	0.325609	0.3		227	71.4065	-1.3495	1.3495	0.111534	0.3		227	130.564	-3.98202	3.98202	0.33251	0.3		227	130.564	-4.03336	4.03336	0.333352	0.3		227	130.564	-1.97413	1.97413	0.163159	0.3		227	86.3376	-1.36114	1.36114	0.113659	0.3		227
228	73.504	-3.67705	3.67705	0.307045	0.3		228	73.504	-4.63118	4.63118	0.382761	0.3		228	73.504	-2.01828	2.01828	0.166808	0.3		228	139.677	-4.84597	4.84597	0.404653	0.3		228	139.677	-3.96255	3.96255	0.327499	0.3		228	139.677	-2.85914	2.85914	0.236304	0.3		228	87.6808	-0.199364	0.199364	0.0166475	0.3		228
229	77.2395	-1.64408	1.64408	0.137286	0.3		229	77.2395	-2.74554	2.74554	0.226915	0.3		229	77.2395	-1.79653	1.79653	0.14848	0.3		229	158.333	-3.27808	3.27808	0.273729	0.3		229	158.333	-2.5599	2.5599	0.211572	0.3		229	158.333	-2.02047	2.02047	0.166989	0.3		229	106.354	-0.421681	0.421681	0.0352116	0.3		229
																					230	166.686	-1.16178	1.16178	0.0970117	0.3		230	166.686	-0.525908	0.525908	0.0434656	0.3		230	166.686	-0.698047	0.698048	0.0576927	0.3		230	112.266	0.317742	0.317742	0.0265324	0.3		230
[truncated: 11 more columns]
