# Supplementary material for: Association of Body Composition With Survival and Treatment Efficacy in Castration-Resistant Prostate Cancer
Source: Front Oncol. 2020 Apr 17;10:558. doi: 10.3389/fonc.2020.00558 (PMC7180747; doi:10.3389/fonc.2020.00558)
Supplement: Table S2 — Multivariable analysis based on selected covariates. [file Table_2.XLSX]

## Sheet: Total
Total set
				PSA progression							Radiologic progression							Overall death
	Univariable			Multivariable model				Univariable			Multivariable model				Univariable			Multivariable model
				Continuous		Categorical					Continuous		Categorical					Continuous		Categorical
	N (event)	HR (95%CI)	p-value	HR (95%CI)	p-value	HR (95%CI)	p-value	N (event)	HR (95%CI)	p-value	HR (95%CI)	p-value	HR (95%CI)	p-value	N (event)	HR (95%CI)	p-value	HR (95%CI)	p-value	HR (95%CI)	p-value
First-line treatment
Docetaxel	144 (119)	1						144 (119)	1						144 (129)	1
ARSi	86 (52)	0.65 (0.47-0.91)	0.0113					86 (49)	0.60 (0.43-0.84)	0.0027					86 (40)	0.58 (0.40-0.83)	0.0027
Age	230 (171)	0.98 (0.96-1.00)	0.0147	0.98 (0.96-1.00)	0.0168	0.98 (0.96-1.00)	0.0403	230 (168)	0.99 (0.97-1.00)	0.0876	0.98 (0.96-1.00)	0.0321	0.98 (0.96-1.00)	0.0584	230 (169)	0.99 (0.98-1.01)	0.4255	1.00 (0.98-1.02)	0.8613	1.00 (0.98-1.02)	0.911
BMI	230 (171)	0.92 (0.88-0.96)	<.001					230 (168)	0.95 (0.91-0.99)	0.0111					230 (169)	0.97 (0.93-1.01)	0.1586
BMI
<25	157 (123)	1						157 (120)	1						157 (120)	1
>=25	73 (48)	0.64 (0.46-0.90)	0.0105					73 (48)	0.71 (0.51-1.00)	0.05					73 (49)	0.76 (0.55-1.07)	0.1162
PSA	230 (171)	1.00 (1.00-1.00)	0.3693	1.00 (1.00-1.00)	0.6266	1.00 (1.00-1.00)	0.4139	230 (168)	1.00 (1.00-1.00)	0.7377	1.00 (1.00-1.00)	0.9198	1.00 (1.00-1.00)	0.6032	230 (169)	1.00 (1.00-1.00)	0.0476	1.00 (1.00-1.00)	0.1027	1.00 (1.00-1.00)	0.0356
Time to castration-resistant	230 (171)	1.00 (0.99-1.01)	0.9385					230 (168)	1.00 (0.99-1.00)	0.6087					230 (169)	1.00 (0.99-1.00)	0.6701
SMI (continuous)	230 (171)	0.96 (0.94-0.98)	<.001	0.96 (0.94-0.98)	<.001			230 (168)	0.96 (0.94-0.97)	<.001	0.95 (0.93-0.97)	<.001			230 (169)	0.98 (0.96-1.00)	0.0284	0.98 (0.96-1.00)	0.0545
SMI (categorical)
SMI<50	118 (92)	1						118 (95)	1				1		118 (93)	1				1
SMI>=50	112 (79)	0.69 (0.51-0.94)	0.0175			0.68 (0.50-0.93)	0.0168	112 (73)	0.56 (0.41-0.77)	<.001			0.54 (0.39-0.75)	<.001	112 (76)	0.70 (0.52-0.95)	0.0221			0.72 (0.52-0.98)	0.0372
VFI (continuous)	230 (171)	0.99 (0.99-1.00)	0.0054	1.00 (0.99-1.00)	0.2389			230 (168)	1.00 (0.99-1.00)	0.1003	1.00 (0.99-1.00)	0.359			230 (169)	0.99 (0.99-1.00)	0.0436	1.00 (0.99-1.01)	0.6568
VFI (categorical)
VFI<60	119 (92)	1						119 (88)	1				1		119 (95)	1				1
VFI>=60	111 (79)	0.65 (0.48-0.88)	0.006			0.81 (0.58-1.15)	0.2419	111 (80)	0.78 (0.57-1.05)	0.1034			0.93 (0.66-1.32)	0.6946	111 (74)	0.68 (0.50-0.92)	0.0135			0.79 (0.56-1.12)	0.178
SFI (continuous)	230 (171)	0.99 (0.98-0.99)	0.0011	0.99 (0.98-1.00)	0.1832			230 (168)	0.99 (0.98-1.00)	0.0496	1.00 (0.98-1.01)	0.4475			230 (169)	0.98 (0.97-0.99)	<.001	0.98 (0.97-0.99)	0.004
SFI (categorical)
SFI<48	112 (92)	1				1		112 (88)	1				1		112 (93)	1				1
SFI>=48	118 (79)	0.57 (0.42-0.77)	<.001			0.68 (0.48-0.95)	0.0232	118 (80)	0.66 (0.49-0.90)	0.0086			0.74 (0.53-1.03)	0.0749	118 (76)	0.60 (0.44-0.82)	0.0011			0.70 (0.5-0.98)	0.039
Diabetes
0	184 (140)	1						184 (135)	1						184 (136)	1
1	46 (31)	1.14 (0.77-1.69)	0.5132					46 (33)	1.22 (0.83-1.79)	0.3158					46 (33)	1.15 (0.79-1.69)	0.4679
ECOG performance status
0	203 (149)	1		1		1		203 (145)	1		1		1		203 (144)	1		1		1
≥1	27 (22)	1.09 (0.69-1.70)	0.7201	1.14 (0.72-1.81)	0.5878	1.00 (0.63-1.58)	0.9918	27 (23)	1.09 (0.70-1.69)	0.7102	1.11 (0.71-1.75)	0.6502	1.02 (0.65-1.60)	0.9265	27 (25)	1.27 (0.83-1.97)	0.2738	1.20 (0.77-1.86)	0.4299	1.23 (0.79-1.91)	0.3621
Bone metastasis
No	34 (25)	1		1		1		34 (24)	1		1		1		34 (26)	1		1		1
Yes	196 (146)	1.04 (0.68-1.59)	0.865	0.93 (0.60-1.43)	0.7285	0.94 (0.60-1.45)	0.7691	196 (144)	0.99 (0.64-1.53)	0.963	0.84 (0.54-1.32)	0.4573	0.88 (0.56-1.37)	0.5645	196 (143)	0.90 (0.59-1.38)	0.642	0.86 (0.55-1.35)	0.5151	0.85 (0.54-1.32)	0.4671
Solid organ metastasis
No	202 (148)	1		1		1		202 (146)	1		1		1		202 (144)	1		1		1
Yes	28 (23)	1.58 (1.02-2.46)	0.0413	1.42 (0.90-2.22)	0.1306	1.39 (0.89-2.19)	0.148	28 (22)	1.34 (0.86-2.11)	0.2007	1.17 (0.74-1.86)	0.5043	1.17 (0.74-1.85)	0.5122	28 (25)	1.53 (1.00-2.35)	0.0503	1.49 (0.97-2.30)	0.0718	1.49 (0.96-2.29)	0.0727

## Sheet: Docetaxel
Docetaxel subset
				PSA progression							Radiologic progression							Overall death
	Univariable			Multivariable model				Univariable			Multivariable model				Univariable			Multivariable model
				Continuous		Categorical					Continuous		Categorical					Continuous		Categorical
	N (event)	HR (95%CI)	p-value	HR (95%CI)	p-value	HR (95%CI)	p-value	N (event)	HR (95%CI)	p-value	HR (95%CI)	p-value	HR (95%CI)	p-value	N (event)	HR (95%CI)	p-value	HR (95%CI)	p-value	HR (95%CI)	p-value
Age	144 (119)	0.99 (0.97-1.01)	0.2555	0.98 (0.96-1.01)	0.1242	0.99 (0.97-1.01)	0.2883	144 (119)	0.99 (0.97-1.02)	0.5058	0.98 (0.96-1.01)	0.132	0.99 (0.97-1.01)	0.3228	144 (129)	1.00 (0.98-1.02)	0.9791	1.00 (0.98-1.02)	0.9714	1.00 (0.98-1.03)	0.7887
BMI	144 (119)	0.93 (0.88-0.98)	0.0038					144 (119)	0.96 (0.91-1.01)	0.1059					144 (129)	0.99 (0.94-1.04)	0.7424
BMI
<25	104 (90)	1						104 (88)	1						104 (94)	1
>=25	40 (29)	0.60 (0.39-0.92)	0.0178					40 (31)	0.73 (0.49-1.10)	0.1364					40 (35)	0.78 (0.53-1.16)	0.2197
PSA	144 (119)	1.00 (1.00-1.00)	0.9829	1.00 (1.00-1.00)	0.8054	1.00 (1.00-1.00)	0.988	144 (119)	1.00 (1.00-1.00)	0.7527	1.00 (1.00-1.00)	0.8082	1.00 (1.00-1.00)	0.9485	144 (129)	1.00 (1.00-1.00)	0.0702	1.00 (1.00-1.00)	0.2356	1.00 (1.00-1.00)	0.1309
Time to castration-resistant	144 (119)	1.00 (0.99-1.01)	0.9805					144 (119)	1.00 (0.99-1.01)	0.8714					144 (129)	1.00 (0.99-1.01)	0.9814
SMI (continuous)	144 (119)	0.95 (0.92-0.97)	<.001	0.94 (0.92-0.97)	<.001			144 (119)	0.93 (0.91-0.96)	<.001	0.92 (0.90-0.95)	<.001			144 (129)	0.97 (0.95-1.00)	0.0257	0.97 (0.95-1.00)	0.0383
SMI (categorical)
SMI<50	77 (67)	1				1		77 (70)	1				1		77 (71)	1				1
SMI>=50	67 (52)	0.61 (0.42-0.89)	0.009			0.60 (0.41-0.89)	0.0098	67 (49)	0.47 (0.32-0.68)	<.001			0.44 (0.30-0.65)	<.001	67 (58)	0.74 (0.52-1.05)	0.0961			0.74 (0.52-1.07)	0.112
VFI (continuous)	144 (119)	0.99 (0.99-1.00)	0.0717	1.00 (0.99-1.01)	0.505			144 (119)	1.00 (0.99-1.01)	0.8226	1.00 (0.99-1.01)	0.9694			144 (129)	1.00 (0.99-1.01)	0.5829	1.00 (0.99-1.01)	0.4517
VFI (categorical)
VFI<60	76 (64)	1				1		76 (63)	1				1		76 (69)	1				1
VFI>=60	68 (55)	0.72 (0.49-1.04)	0.0759			0.84 (0.55-1.28)	0.4059	68 (56)	0.83 (0.58-1.20)	0.3158			0.89 (0.58-1.35)	0.5762	68 (60)	0.84 (0.59-1.20)	0.3352			0.93 (0.62-1.41)	0.7444
SFI (continuous)	144 (119)	0.99 (0.98-1.00)	0.0631	1.00 (0.98-1.01)	0.648			144 (119)	1.00 (0.99-1.01)	0.6882	1.00 (0.99-1.02)	0.7978			144 (129)	0.99 (0.98-1.00)	0.032	0.99 (0.97-1.00)	0.0847
SFI (categorical)
SFI<48	77 (67)	1				1		77 (64)	1				1		77 (70)	1				1
SFI>=48	67 (52)	0.65 (0.45-0.94)	0.0236			0.76 (0.51-1.13)	0.1689	67 (55)	0.80 (0.55-1.15)	0.2276			0.91 (0.61-1.34)	0.6245	67 (59)	0.71 (0.50-1.00)	0.0504			0.75 (0.51-1.11)	0.1482
Diabetes
0	122 (103)	1						122 (103)	1						122 (109)	1
1	22 (16)	1.16 (0.68-1.97)	0.5926					22 (16)	1.14 (0.67-1.95)	0.6224					22 (20)	1.29 (0.80-2.09)	0.2939
ECOG performance status
0	122 (101)	1		1		1		122 (99)	1		1		1		122 (108)	1		1		1
≥1	22 (18)	0.82 (0.50-1.36)	0.4387	1.10 (0.65-1.87)	0.7205	0.92 (0.54-1.56)	0.7522	22 (20)	0.91 (0.56-1.47)	0.6912	1.13 (0.69-1.86)	0.6265	1.03 (0.62-1.71)	0.9029	22 (21)	1.10 (0.68-1.78)	0.7024	1.13 (0.69-1.88)	0.6242	1.11 (0.67-1.84)	0.6965
Bone metastasis
No	21 (16)	1		1		1		21 (18)	1		1		1		21 (20)	1		1		1
Yes	123 (103)	1.22 (0.72-2.07)	0.4676	1.05 (0.60-1.84)	0.8741	1.02 (0.58-1.81)	0.9428	123 (101)	1.01 (0.61-1.67)	0.9804	0.93 (0.54-1.60)	0.7935	0.88 (0.51-1.53)	0.659	123 (109)	1.01 (0.62-1.64)	0.974	0.91 (0.54-1.54)	0.7376	0.90 (0.53-1.52)	0.6816
Solid organ metastasis
No	124 (102)	1		1		1		124 (101)	1		1		1		124 (110)	1		1		1
Yes	20 (17)	1.47 (0.88-2.46)	0.1446	1.53 (0.90-2.60)	0.1137	1.45 (0.85-2.45)	0.1709	20 (18)	1.52 (0.92-2.52)	0.1066	1.67 (0.99-2.82)	0.0535	1.53 (0.91-2.59)	0.111	20 (19)	1.42 (0.87-2.31)	0.1655	1.43 (0.86-2.37)	0.1721	1.47 (0.89-2.44)	0.1326

## Sheet: ARSI
ARSI subset
				PSA progression							Radiologic progression							Overall death
	Univariable			Multivariable model				Univariable			Multivariable model				Univariable			Multivariable model
				Continuous		Categorical					Continuous		Categorical					Continuous		Categorical
	N (event)	HR (95%CI)	p-value	HR (95%CI)	p-value	HR (95%CI)	p-value	N (event)	HR (95%CI)	p-value	HR (95%CI)	p-value	HR (95%CI)	p-value	N (event)	HR (95%CI)	p-value	HR (95%CI)	p-value	HR (95%CI)	p-value
Age	86 (52)	0.98 (0.95-1.01)	0.1872	0.98 (0.94-1.01)	0.1555	0.98 (0.94-1.01)	0.1651	86 (49)	0.99 (0.96-1.03)	0.626	0.98 (0.95-1.02)	0.3773	0.99 (0.95-1.02)	0.4744	86 (40)	1.00 (0.96-1.04)	0.9314	1.00 (0.96-1.03)	0.8257	1.00 (0.96-1.04)	0.8585
BMI	86 (52)	0.93 (0.85-1.01)	0.0846					86 (49)	0.95 (0.87-1.03)	0.1981					86 (40)	0.95 (0.86-1.05)	0.343
BMI
<25	53 (33)	1						53 (32)	1						53 (26)	1
>=25	33 (19)	0.76 (0.43-1.37)	0.3651					33 (17)	0.74 (0.4-1.36)	0.3313					33 (14)	0.86 (0.45-1.65)	0.6415
PSA	86 (52)	1.00 (1.00-1.00)	0.2095	1.00 (1.00-1.00)	0.3818	1.00 (1.00-1.00)	0.2963	86 (49)	1.00 (1.00-1.00)	0.6187	1.00 (1.00-1.00)	0.7056	1.00 (1.00-1.00)	0.5621	86 (40)	1.00 (1.00-1.00)	0.3495	1.00 (1.00-1.00)	0.2949	1.00 (1.00-1.00)	0.1729
Time to castration-resistant	86 (52)	1.00 (0.99-1.01)	0.7233					86 (49)	1.00 (0.99-1.00)	0.301					86 (40)	1.00 (0.99-1.01)	0.5839
SMI (continuous)	86 (52)	0.98 (0.95-1.01)	0.1942	0.98 (0.94-1.02)	0.2974			86 (49)	0.98 (0.95-1.01)	0.2019	0.97 (0.94-1.01)	0.1484			86 (40)	0.99 (0.95-1.03)	0.5702	1.00 (0.96-1.05)	0.8764
SMI (categorical)
SMI<50	41 (25)	1				1		41 (25)	1				1		41 (22)	1				1
SMI>=50	45 (27)	0.84 (0.48-1.46)	0.5364			0.93 (0.52-1.66)	0.7976	45 (24)	0.83 (0.47-1.46)	0.5132			0.84 (0.46-1.54)	0.5793	45 (18)	0.66 (0.35-1.23)	0.1875			0.81 (0.42-1.59)	0.5457
VFI (continuous)	86 (52)	0.99 (0.98-1.00)	0.0404	1.00 (0.98-1.01)	0.4232			86 (49)	0.99 (0.98-1.00)	0.0565	0.99 (0.98-1.01)	0.3635			86 (40)	0.99 (0.97-1.00)	0.0283	1.00 (0.98-1.02)	0.922
VFI (categorical)
VFI<60	43 (28)	1				1		43 (25)	1				1		43 (26)	1				1
VFI>=60	43 (24)	0.57 (0.33-1.00)	0.0493			0.70 (0.35-1.39)	0.3094	43 (24)	0.70 (0.40-1.25)	0.2289			0.95 (0.48-1.87)	0.8725	43 (14)	0.39 (0.20-0.76)	0.0059			0.48 (0.22-1.04)	0.0623
SFI (continuous)	86 (52)	0.97 (0.95-0.99)	0.006	0.98 (0.96-1.01)	0.1847			86 (49)	0.98 (0.96-1.00)	0.025	0.99 (0.96-1.02)	0.3939			86 (40)	0.97 (0.95-0.99)	0.0019	0.97 (0.94-1.00)	0.0319
SFI (categorical)
SFI<48	35 (25)	1				1		35 (24)	1				1		35 (23)	1				1
SFI>=48	51 (27)	0.45 (0.25-0.78)	0.0046			0.56 (0.29-1.10)	0.0936	51 (25)	0.49 (0.28-0.86)	0.0129			0.48 (0.24-0.94)	0.0327	51 (17)	0.44 (0.23-0.81)	0.0093			0.61 (0.29-1.25)	0.1762
Diabetes
0	62 (37)	1						62 (32)	1						62 (27)	1
1	24 (15)	1.50 (0.80-2.79)	0.2041					24 (17)	1.80 (0.97-3.33)	0.0618					24 (13)	1.22 (0.63-2.37)	0.5602
ECOG performance status
0	81 (48)	1		1		1		81 (46)	1		1		1		81 (36)	1		1		1
≥1	5 (4)	3.55 (1.24-10.16)	0.0183	2.55 (0.58-11.20)	0.2152	3.31 (0.85-12.87)	0.0846	5 (3)	1.37 (0.42-4.45)	0.5966	1.62 (0.32-8.26)	0.5616	1.50 (0.36-6.37)	0.5796	5 (4)	1.76 (0.62-4.97)	0.2865	0.77 (0.20-2.97)	0.703	1.22 (0.35-4.27)	0.7543
Bone metastasis
No	13 (9)	1		1		1		13 (6)	1		1		1		13 (6)	1		1		1
Yes	73 (43)	0.66 (0.32-1.37)	0.2625	0.72 (0.32-1.61)	0.4272	0.73 (0.33-1.63)	0.4441	73 (43)	0.95 (0.40-2.25)	0.8985	1.03 (0.40-2.69)	0.9508	1.09 (0.43-2.81)	0.8561	73 (34)	0.75 (0.31-1.80)	0.5197	0.87 (0.32-2.33)	0.7753	0.88 (0.33-2.37)	0.8043
Solid organ metastasis
No	78 (46)	1		1		1		78 (45)	1		1		1		78 (34)	1		1		1
Yes	8 (6)	1.61 (0.68-3.82)	0.2822	1.02 (0.31-3.33)	0.9779	0.79 (0.26-2.43)	0.6838	8 (4)	0.69 (0.24-1.99)	0.4936	0.44 (0.11-1.86)	0.2655	0.43 (0.12-1.56)	0.1984	8 (6)	1.92 (0.80-4.58)	0.1427	2.25 (0.74-6.84)	0.1517	1.36 (0.48-3.90)	0.5665
